# Supplementary material
Source: Copernicus journal article supplement (doi:10.5194/amt-19-4219-2026)
Supplement: Supplementary file 1 [file amt-19-4219-2026-supplement.pdf]

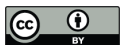

*Supplement of*

## **Improving imputation of missing PM<sub>2.5</sub> speciation data using PMF-informed source-receptor relationships**

**Wubin Zhu et al.**

*Correspondence to:* Qili Dai (daiql@nankai.edu.cn)

The copyright of individual parts of the supplement might differ from the article licence.

# S1 Supplementary Texts

## S1.1 The Generation Mechanism of Gaps in Data

Short gaps are generated from an exponential distribution with  $\lambda$  as a parameter, which is determined by the proportion of the short gap (Moritz et al., 2015). The lengths of short gaps and median gaps are defined by their physical meaning and the frequency of gaps with a length of 6 (Table S2), similar to the lengths of median and large gaps. The generation of large gaps follows a uniform distribution between 7 and 23, and between 23 and 161, respectively. The parameter 161 is chosen to confine the missing data to gaps lasting more than 5 days, which is the longest gap in the dataset.

## S1.2 Evaluation of Model Performance

To evaluate the performance of imputation methods, each imputed value was individually compared against the actual observed value separately. Three indicators were employed to assess the performance of these methods (Bennett et al., 2013; Ibrahim and Khatib, 2017): the coefficient of determination ( $R^2$ ), and mean absolute percentage error, and index of agreement (IoA).  $R^2$  reflects the consistency of the trend between the predicted and observed values. IoA is similar to R but is specifically designed to measure differences in the means and variances between imputed and observed values. Lower MAPE indicate that the imputed values are closer to the actual observations, while higher  $R^2$  and IoAd suggest greater consistency between the imputed values and the observations. The expressions of the indicators are shown as follows:

$$R^2 = \left[ \frac{\sum_{i=1}^n (y_i - \bar{y})(\hat{y}_i - \tilde{y})}{\sqrt{\sum_{i=1}^n (y_i - \bar{y})^2} \sqrt{\sum_{i=1}^n (\hat{y}_i - \tilde{y})^2}} \right]^2 \quad (S1)$$

$$IoA = 1 - \frac{\sum_{i=1}^n (y_i - \hat{y}_i)^2}{\sum_{i=1}^n (|\hat{y}_i - \bar{y}| + |y_i - \bar{y}|)^2} \quad (S2)$$

$$MAPE = \frac{1}{n} \sum_{i=1}^n \left| \frac{y_i - \hat{y}_i}{y_i} \right| \times 100\% \quad (S3)$$

Where,  $y_i$  and  $\hat{y}_i$  are the  $i$ th observation for the imputed and the original datasets, while  $\bar{y}$  and  $\tilde{y}$  are the means for the imputed and the original datasets.

## S1.3 Details of Data Treatment and Uncertainties Estimation in PMF Analysis for Source Apportionment

For the purpose of selection for the reasonable factor profiles for PMF reconstruction, the species required for imputation have to be included in the PMF run. The simulated dataset includes five bulk species:  $\text{NH}_4^+$ ,  $\text{SO}_4^{2-}$ ,  $\text{NO}_3^-$ , OC, and EC and fifteen elements: K, Fe, Zn, Ca, Si, Mn, Pb, Cu, Ti, As, V, Ba, Cr, Se, and Ni. These species are all put into PMF run for SA. The dataset was pretreat by excluding samples where one of  $\text{NH}_4^+$ ,  $\text{SO}_4^{2-}$ ,  $\text{NO}_3^-$  is missing. Then the simulation is conducted on the processed dataset. Both the original and artificially generated missing values are replaced by geometric mean and the corresponding uncertainty are set as four times as the geometric mean. For observed values, the imputed uncertainty data was calculated as (Liu et al., 2017):

$$\text{Uncertainty} = \sqrt{(\text{error fraction} \times \text{concentration})^2 + (0.5 \times \text{detection limit})^2} \quad (S4)$$

where the error fraction was estimated as 10% for all chemical species (Kim et al., 2005; Kim and Hopke, 2007; Tian et al., 2016). Missing and BDL values of individual species, and their accompanying uncertainties were routinely replaced in a same manner as Polissar et al (1998).

In this study, the final factor number of PMF solution was determined based on the interpretability of factor profiles and the model performance.

## S1.4 Discussion on Data Treatment of PMFr Uncertainty

The uncertainty matrix directly determines the statistical weight of individual data points in the Positive Matrix Factorization (PMF) objective function ( $Q$ ). In PMFr, uncertainty assignment is designed according to the role of each filled value in constraining the source contribution matrix ( $G$ ). Specifically, when imputing tracers, the availability of co-tracers should first be checked at each timestamp because  $G$  needs to be constrained by source-specific tracer information.

If all tracers associated with a specific factor are simultaneously missing, the corresponding  $G$  vector is less directly constrained by observed species. In such cases, the missing tracer values are first estimated using another imputation method, with KNN recommended for its simplicity, efficiency, and ability to provide a reasonable estimate of temporal variation. The corresponding uncertainty is set to 10% of the imputed concentration. This uncertainty setting allows the pre-imputed tracer values to retain sufficient statistical weight in the PMF calculation, so that they can provide source-specific temporal information for constraining  $G$ , rather than being effectively ignored during factorization. This setting is supported by previous PMF analysis using the same observation site hourly PM<sub>2.5</sub> speciation dataset (Xie et al., 2022). For missing tracers with available co-tracers, as well as for non-tracers, missing values are replaced by the species-specific geometric mean. In these cases, the filled values are not intended to provide the primary temporal constraint for the corresponding source factor, because available co-tracers or other observed species already provide stronger information for resolving  $G$ . Therefore, these filled values are assigned a much larger uncertainty, defined as eight times the geometric mean. Standard receptor-modeling practice commonly assigns missing data an uncertainty of four times the median or geometric mean concentration (Polissar et al., 1998). Here, a larger multiplier was adopted to more strongly downweight these filled values. This treatment minimizes the influence of potentially biased geometric mean substitutions on the  $Q$ -value objective function and ensures that the PMF solution is primarily driven by reliable observed species and available source-related tracers.

## S1.5 Sensitivity Analysis of the First Pre-imputation Step

Sensitivity analysis was conducted to quantify the impact of the pre-imputation step. As shown in Table S14, the final PMFr reconstruction metrics vary depending on the initial pre-imputation algorithm. For  $\text{NH}_4^+$ , utilizing KNN as the pre-imputation method yields an  $R^2$  of 0.92, an IoA of 0.95, and a MAPE of 20.67%. DBN results in an  $R^2$  of 0.95, an IoA of 0.92, and a MAPE of 23.61%. BPCA produces an  $R^2$  of 0.96, an IoA of 0.81, and a MAPE of 24.58%. Across the tested algorithms for  $\text{NH}_4^+$ , the  $R^2$  values range from 0.92 to 0.96, and the MAPE ranges from 20.67% to 24.58%. For  $\text{NO}_3^-$ , KNN achieves an  $R^2$  of 0.85, an IoA of 0.95, and a MAPE of 23.92%. DBN yields an  $R^2$  of 0.89, an IoA of 0.91, and a MAPE of 33.11%. BPCA results in an  $R^2$  of 0.90, an IoA of 0.75, and a MAPE of 22.91%. For  $\text{NO}_3^-$ , the resulting  $R^2$  values range from 0.85 to 0.90, while the MAPE spans from 22.91% to 33.11%. These results suggest that the PMFr maintains robust imputation performance regardless of the specific pre-imputation algorithm applied. Although the initial step is required, the PMFr method yields better performances than the baseline KNN approach. For  $\text{NH}_4^+$  under MCMS, the PMFr MAPE is 20.67% versus the KNN MAPE of 24.00% at a 10% missing rate, and 25.87% versus 45.33% at a 20% missing rate. These results suggest that the final PMFr reconstruction is relatively insensitive to the choice of pre-imputation algorithm, provided that the initial method captures the general temporal variation of the missing species. Although an initial estimate is required, PMFr consistently improves upon the baseline KNN imputation after PMF-based reconstruction. For  $\text{NH}_4^+$  under MCMS, the PMFr MAPE is 20.67% versus the KNN MAPE of 24.00% at a 10% missing rate, and 25.87% versus 45.33% at a 20% missing rate. This improvement is achieved because subsequent PMF iterations impose source-profile constraints on the reconstructed values, such as maintaining a  $\text{NO}_3^-/\text{NH}_4^+$  mass ratio of approximately 3 for the SN factor.

## S2 Supplementary Figures

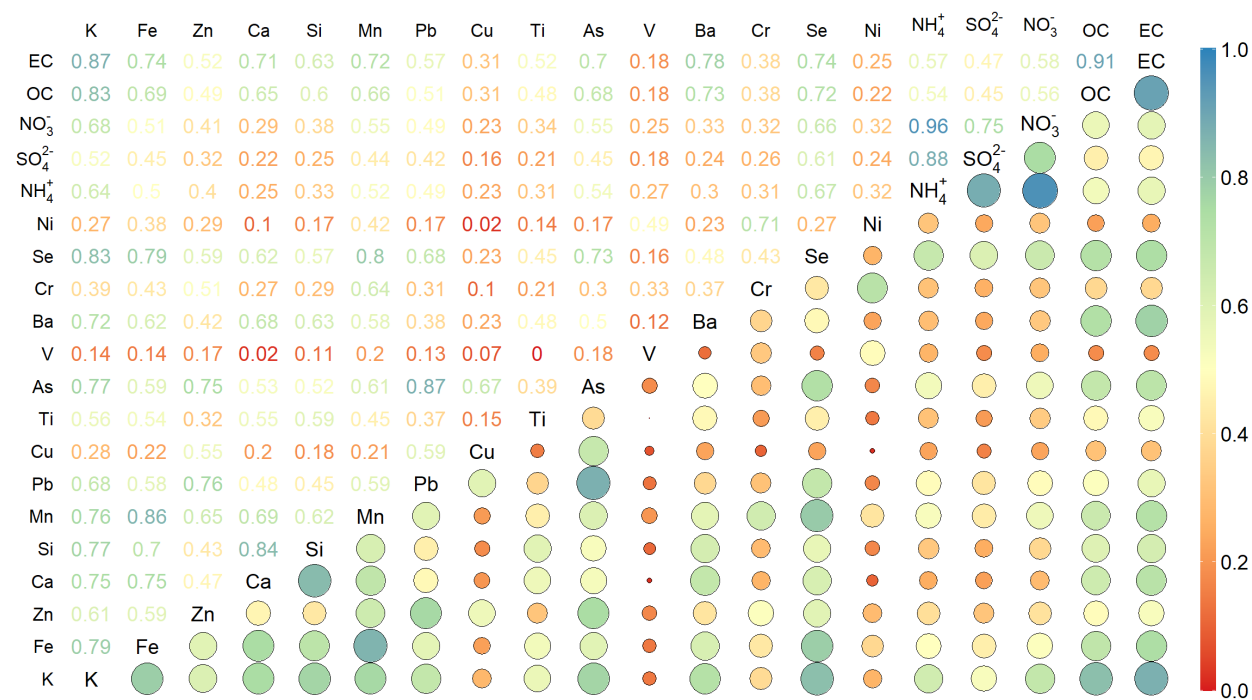

Figure S1. The correlation coefficients among species in the PM<sub>2.5</sub> speciation dataset.

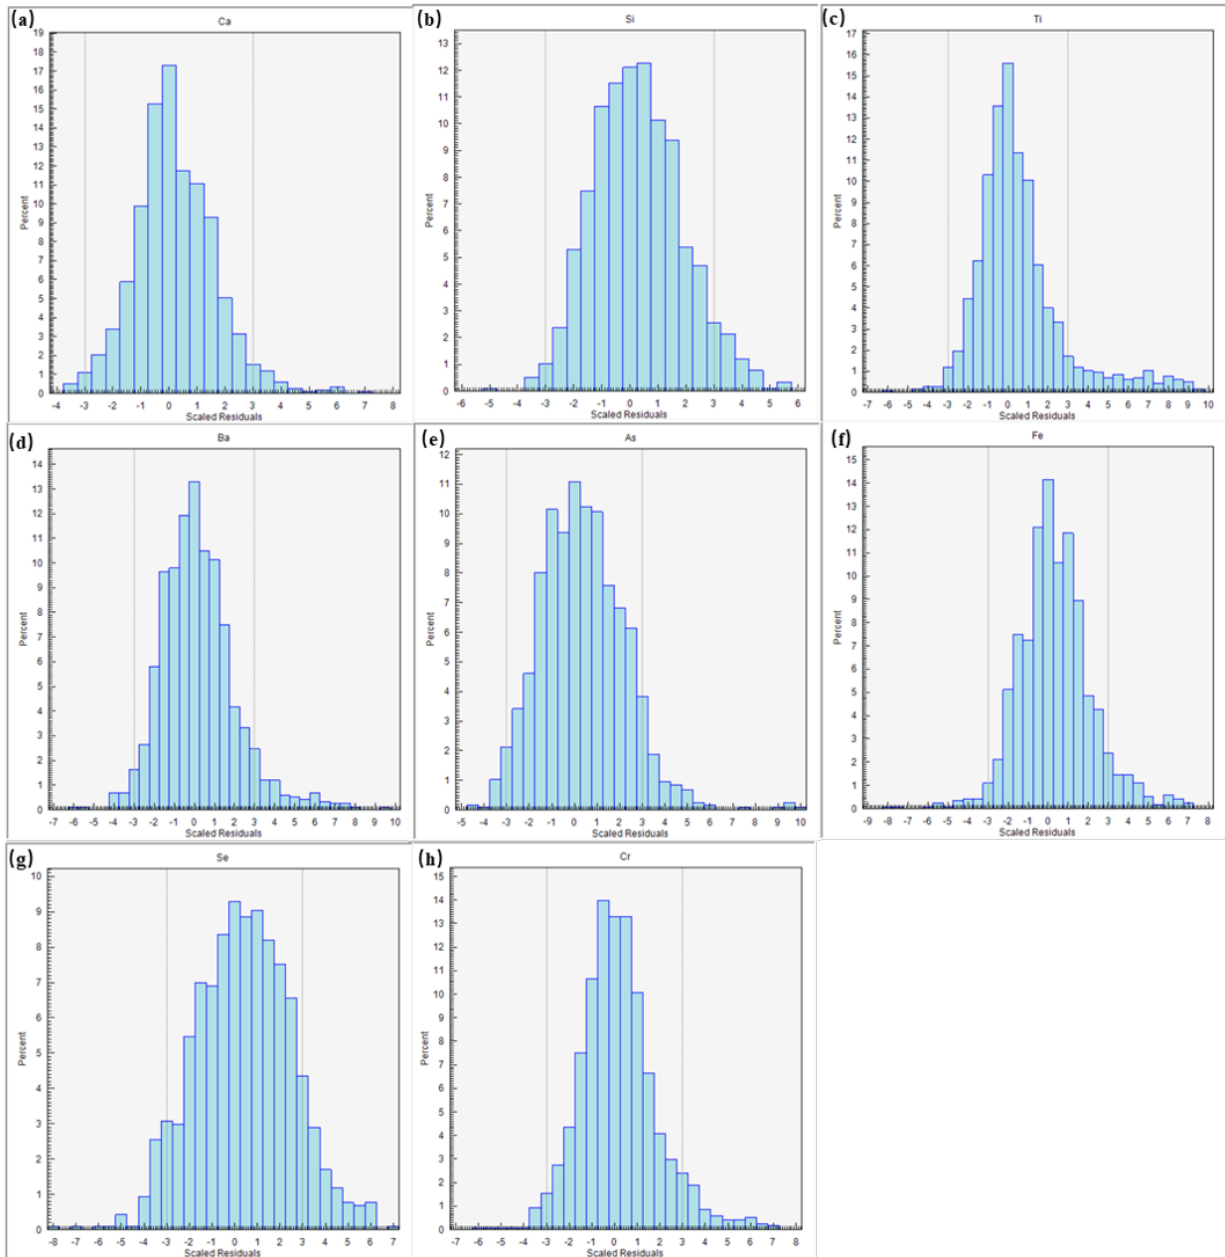

Figure S2. The histogram of scaled residuals of (a) Ca; (b) Si; (c) Ti; (d) Ba; (e) As; (f) Fe; (g) Se; and (h) Cr of the 7-factor solution.

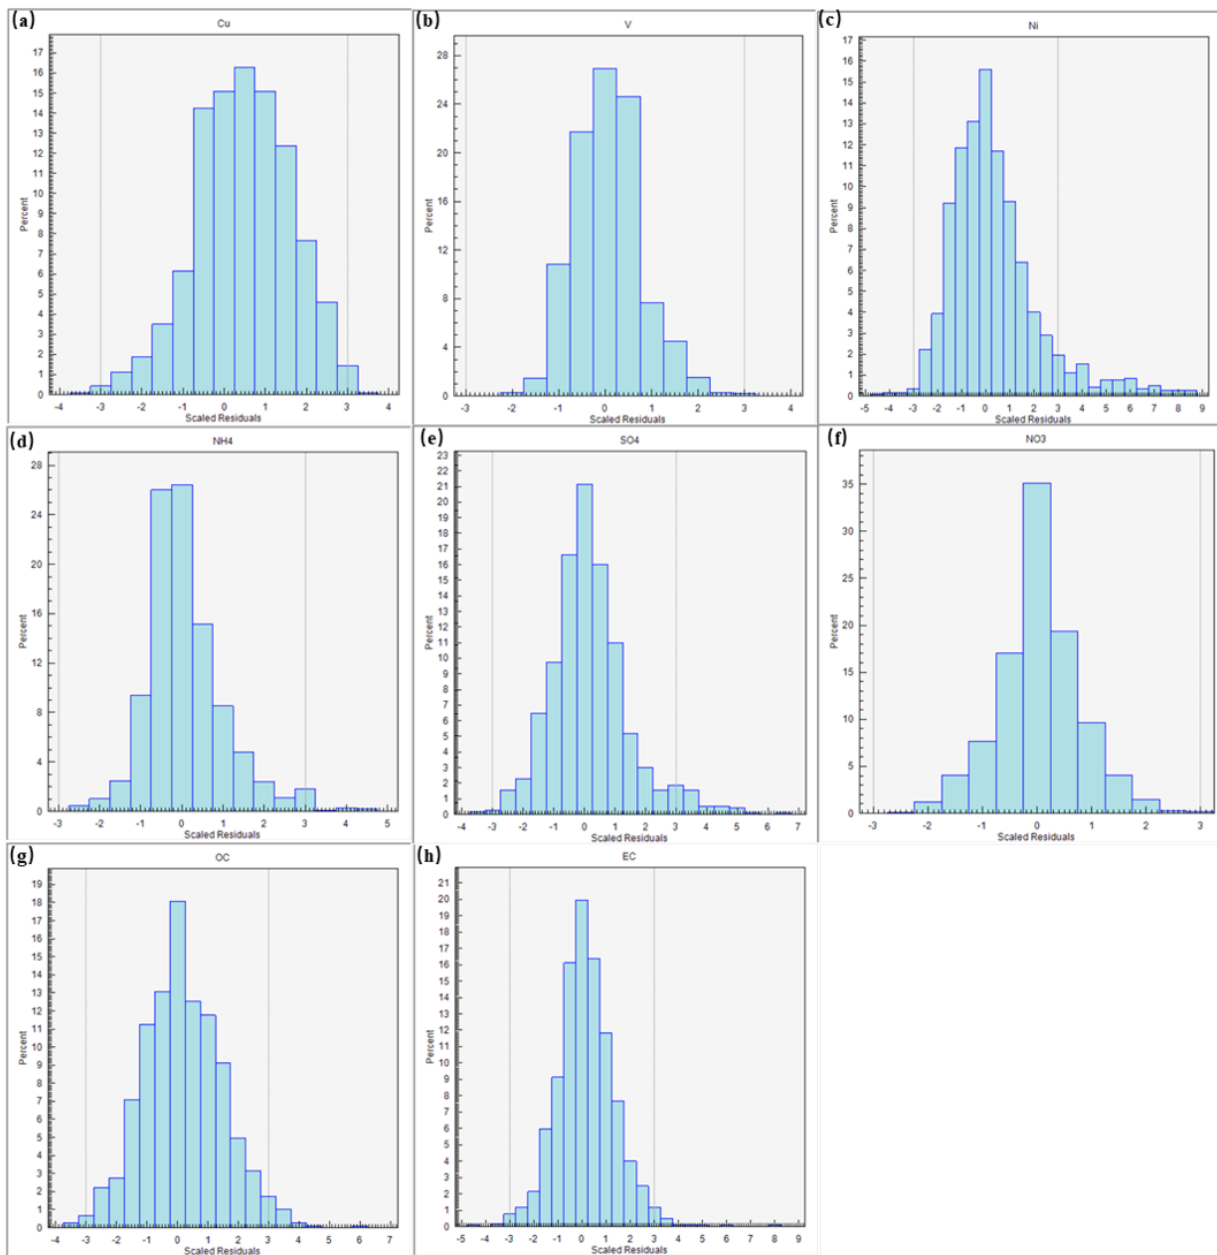

Figure S3. The histogram of scaled residuals of (a) Cu; (b) V; (c) Ni; (d) NH<sub>4</sub><sup>+</sup>; (e) SO<sub>4</sub><sup>2-</sup>; (f) NO<sub>3</sub><sup>-</sup>; (g) OC; and (h) EC of the 7-factor solution.

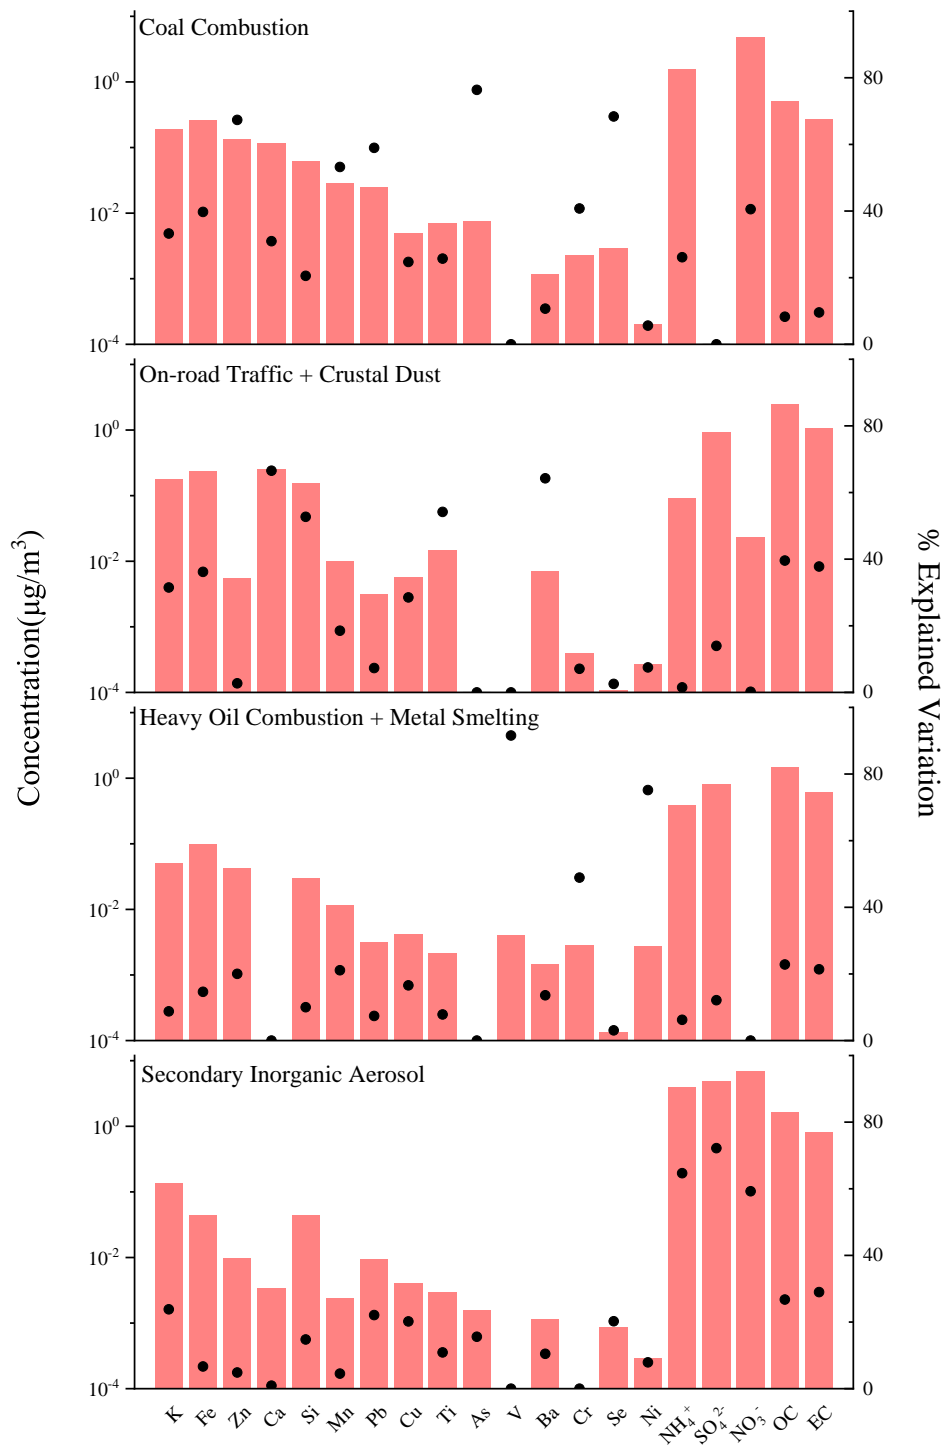

Figure S4. The factor profile of 4-factor solution

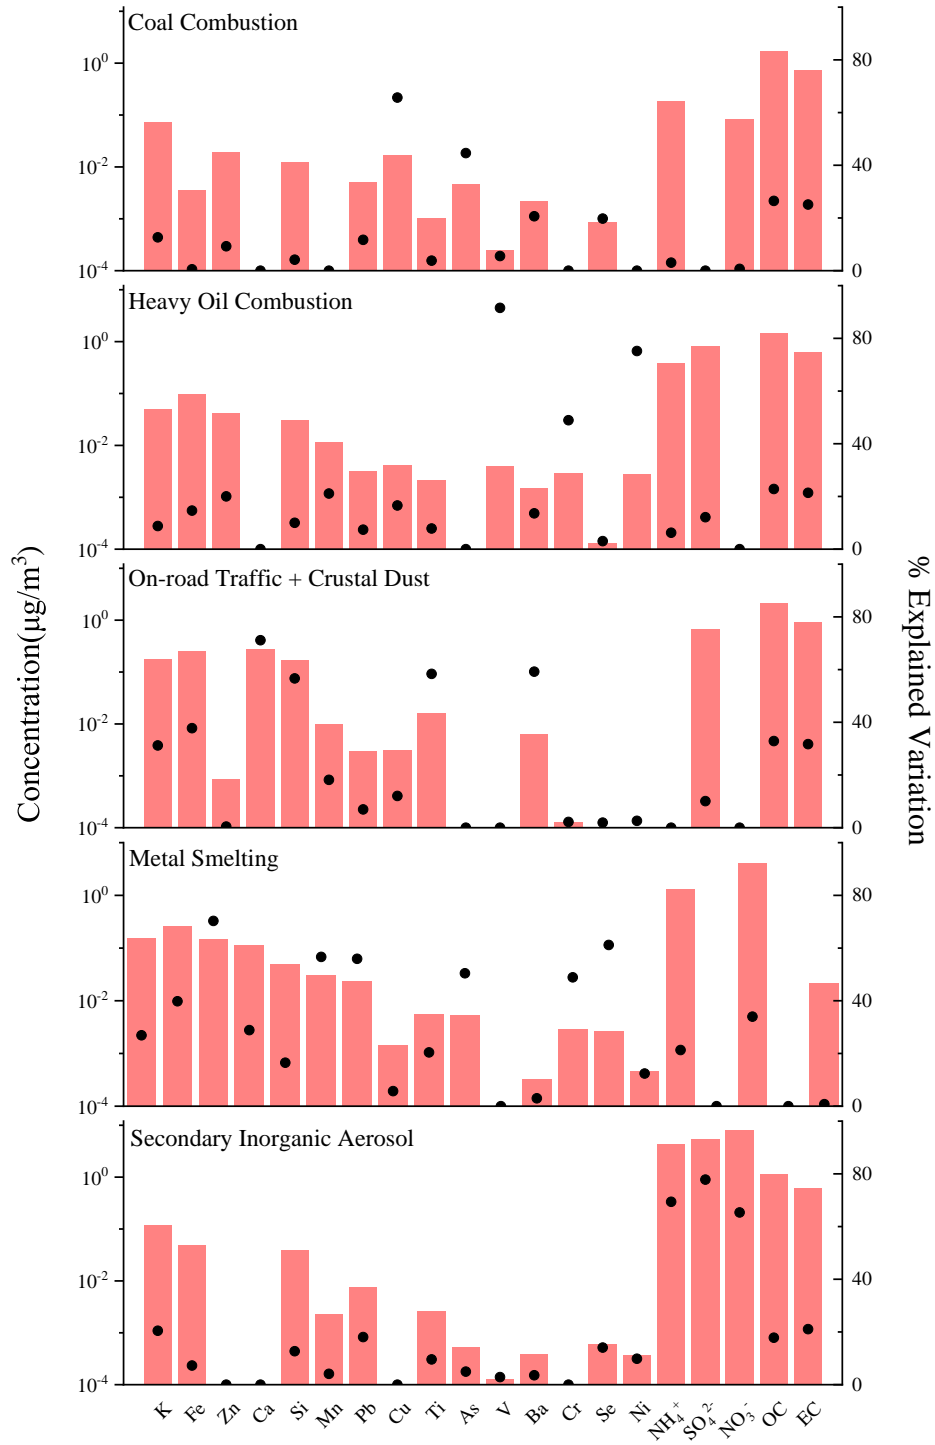

Figure S5. The factor profile of 5-factor solution.

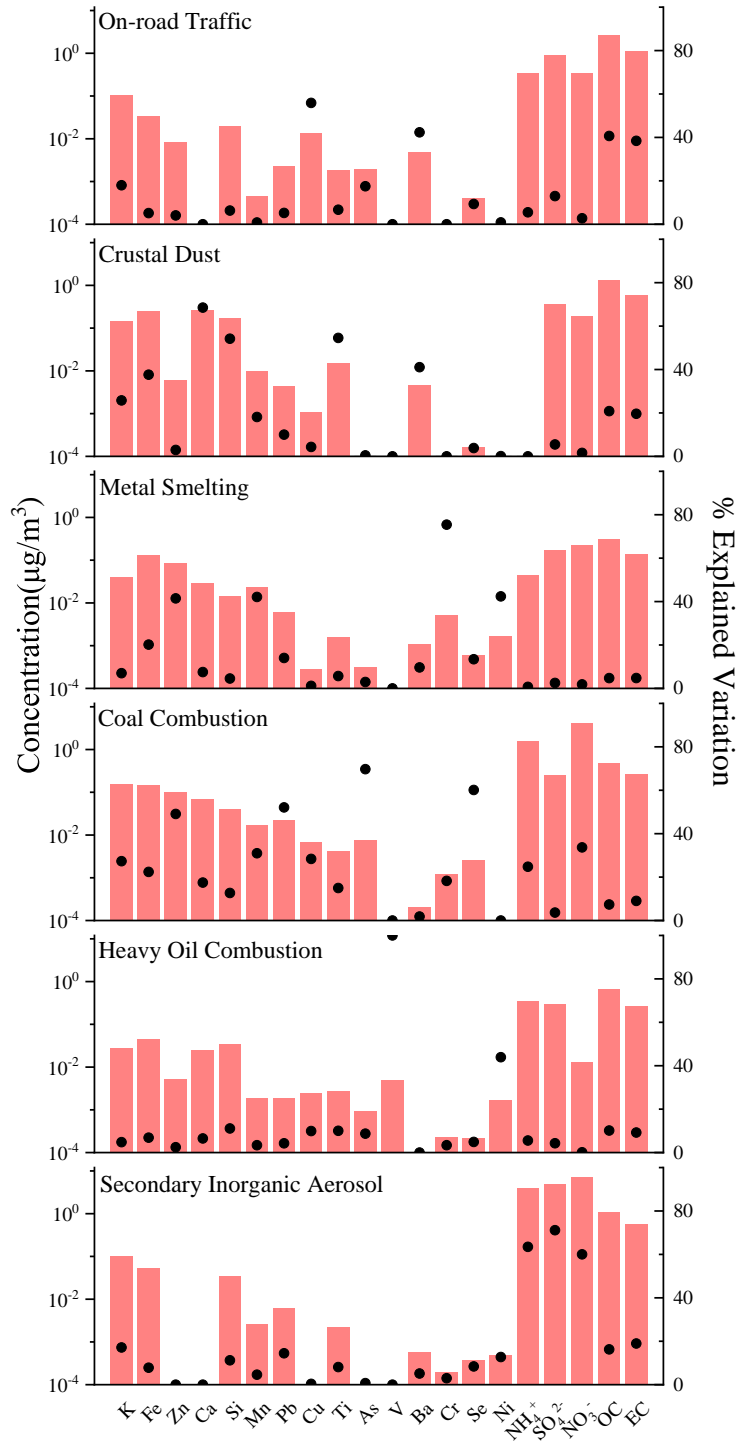

Figure S6. The factor profile of 6-factor solution.

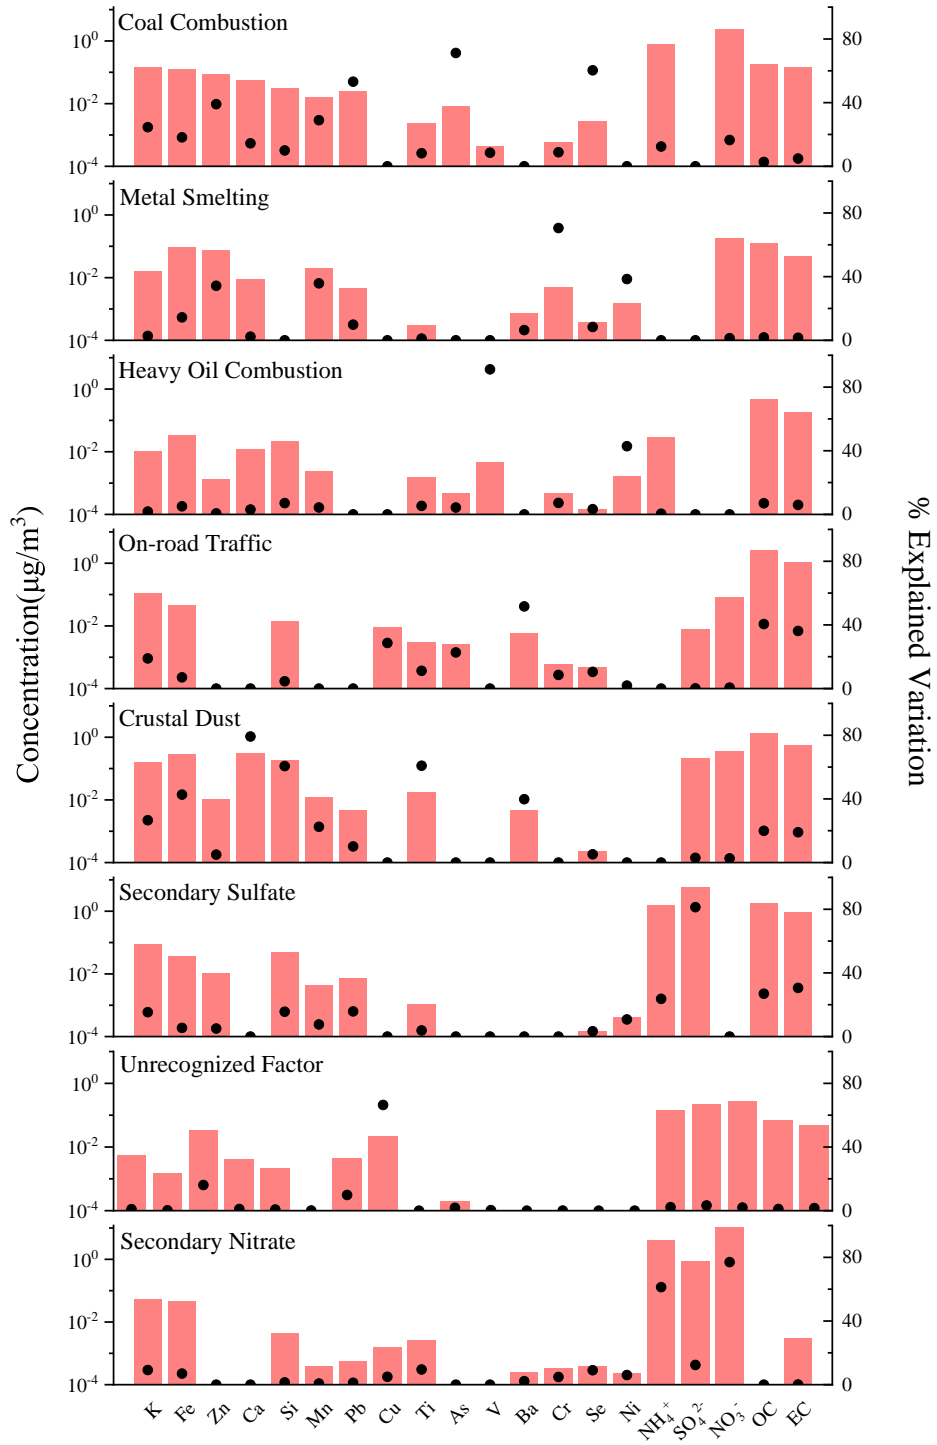

Figure S7. The factor profile of 8-factor solution.

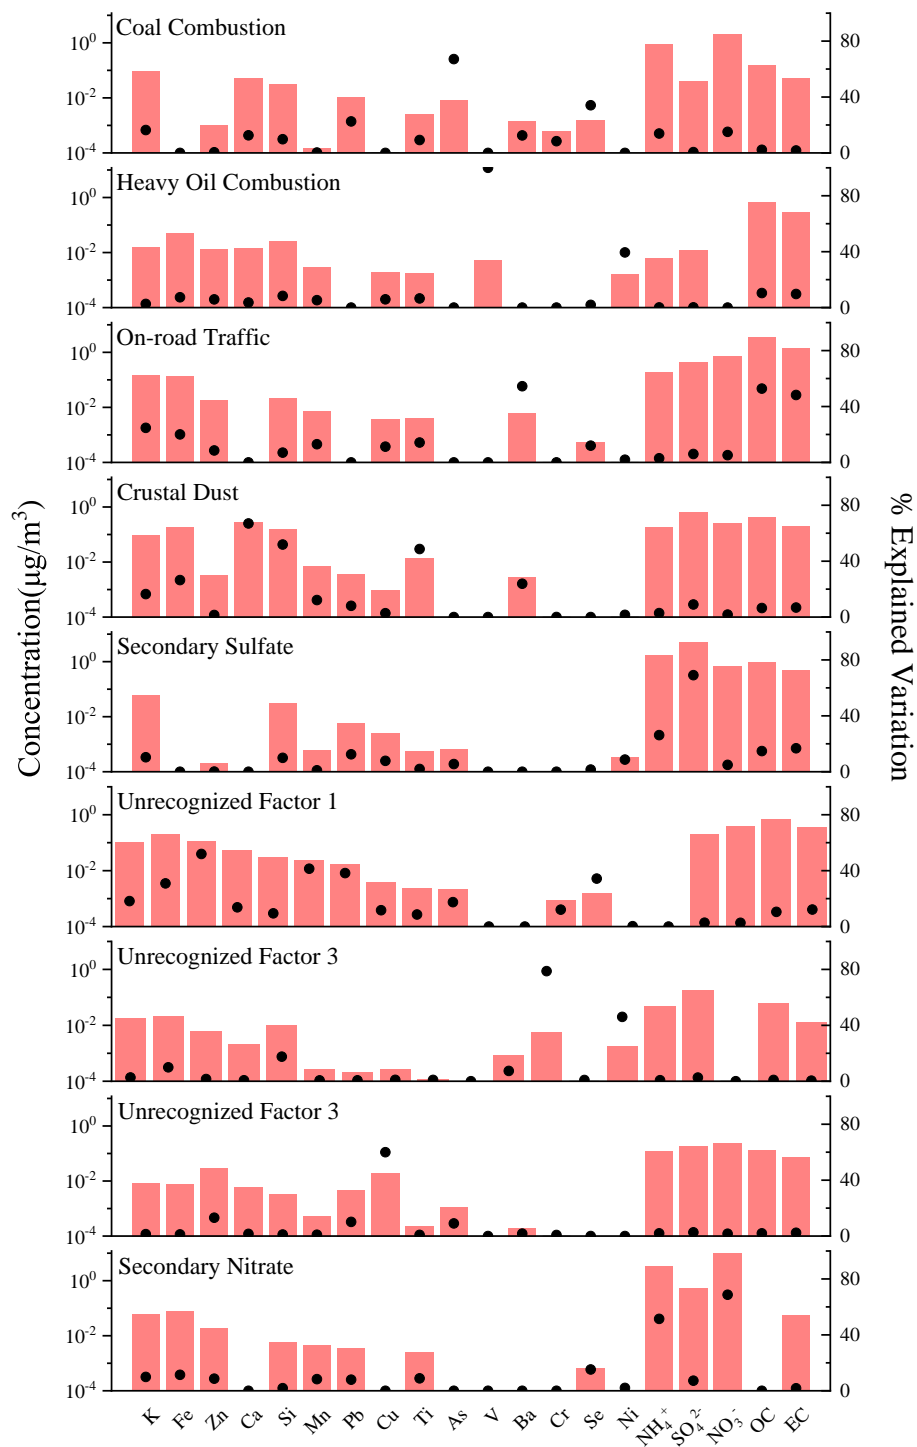

Figure S8. The factor profile of 9-factor solution.

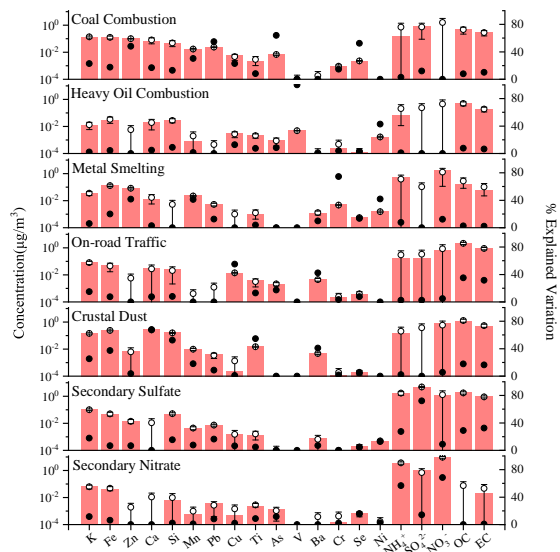

Figure S9. Factor profiles of 7-factor solutions. The bars are the estimated concentrations, the solid points are the explained variations, the asymmetric error bars represent the maximum and minimum DISP values.

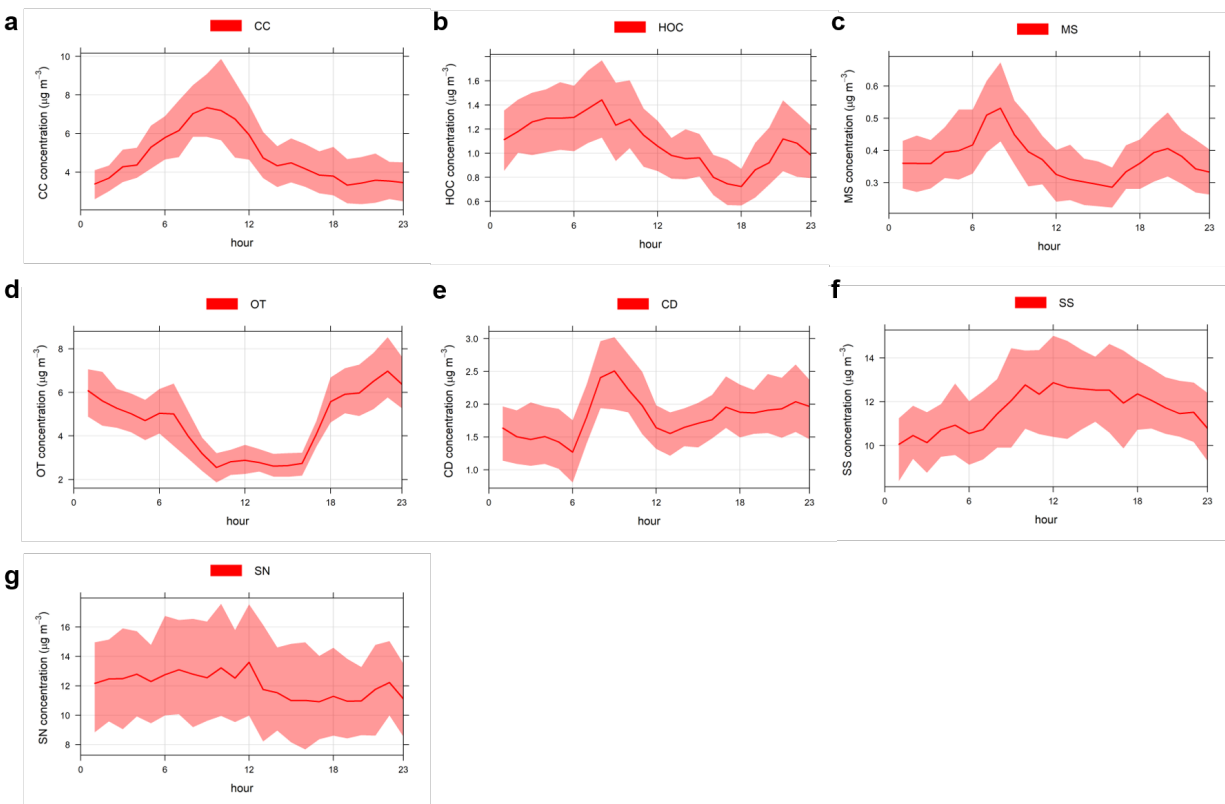

Figure S10. Diurnal variations of the seven factors resolved by PMF: **a** Coal Combustion; **b** Heavy Oil Combustion; **c** Metal Smelting; **d** On-road Traffic; **e** Crustal Dust; **f** Secondary Sulfate; **g** Secondary Nitrate. Shaded areas indicate the 95% confidence intervals.

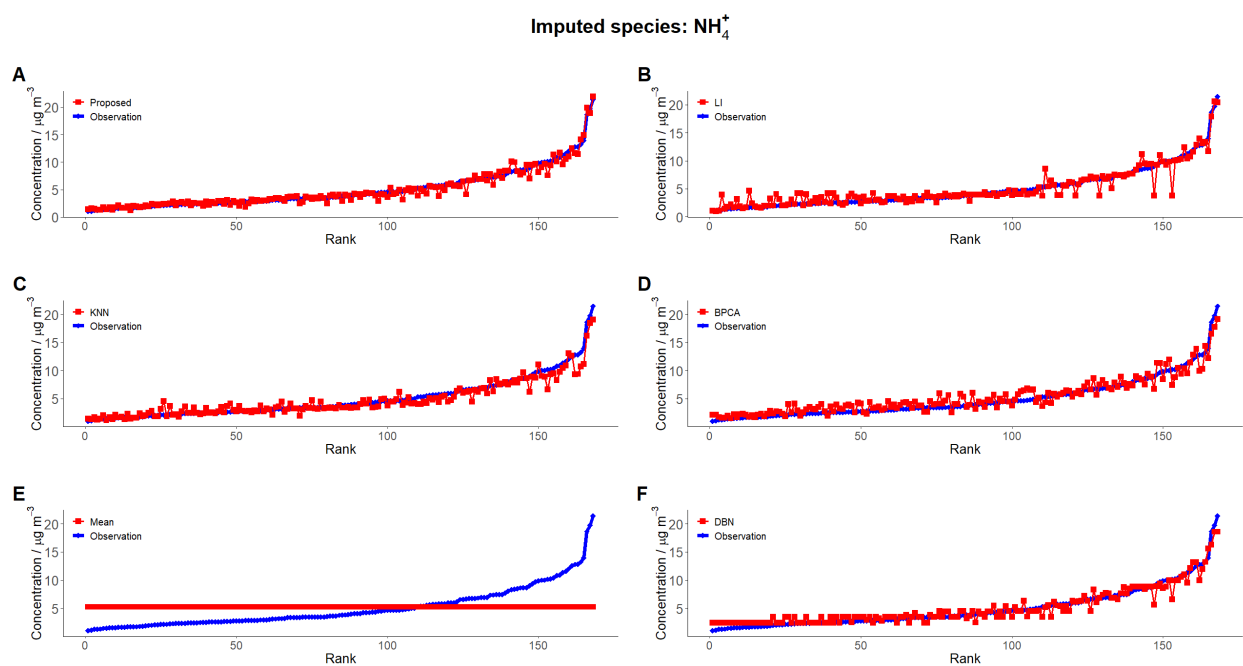

Figure S11. The comparison of imputed values and actual values for  $\text{NH}_4^+$  under Case 1. Actual and imputed values are ranked according to the actual values. **A** this study; **B** LI; **C** KNN; **D** BPCA; **E** Mean; **F** DBN

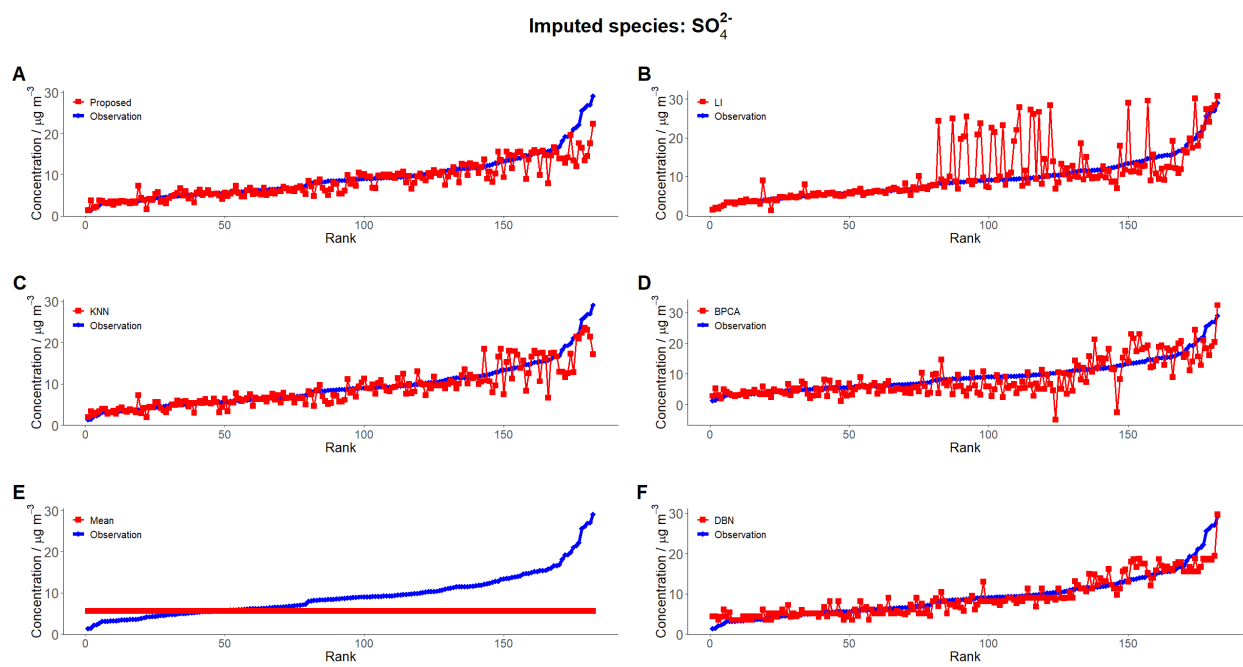

Figure S12. The comparison of imputed values and actual values for  $\text{SO}_4^{2-}$  under Case 1. Actual and imputed values are ranked according to the actual values. **a** this study; **B** LI; **C** KNN; **D** BPCA; **E** Mean; **F** DBN

Imputed species:  $\text{NO}_3^-$

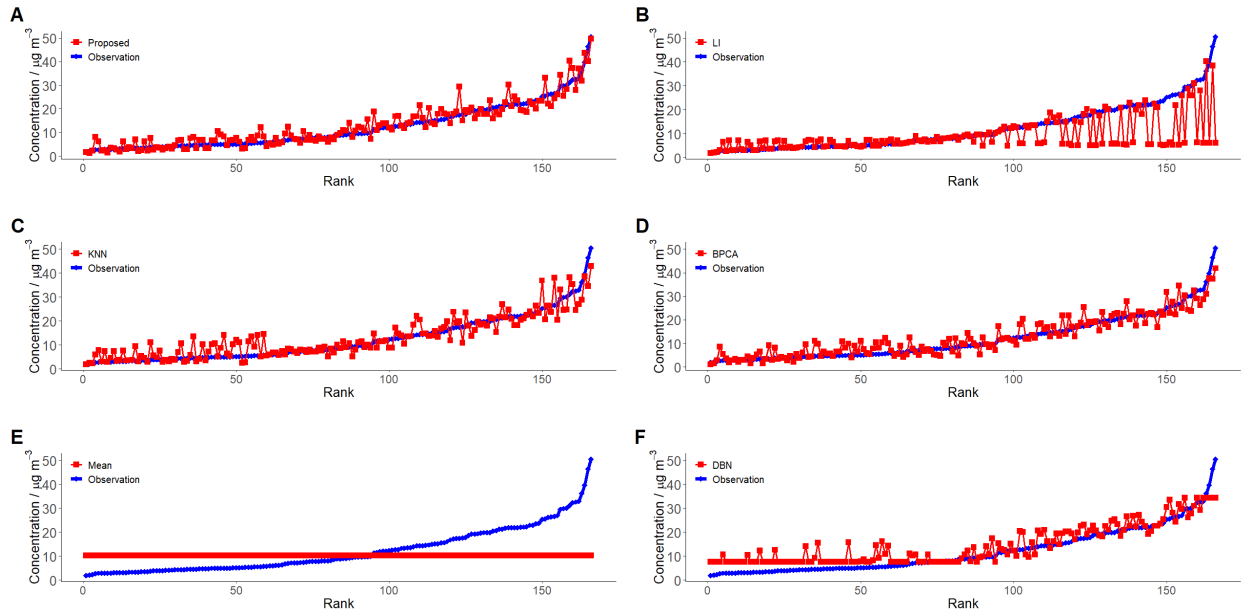

Figure S13. The comparison of imputed values and actual values for  $\text{NO}_3^-$  under Case 1. Actual and imputed values are ranked according to the actual values. **a** this study; **B** LI; **C** KNN; **D** BPCA; **E** Mean; **F** DBN

Imputed species: Ca

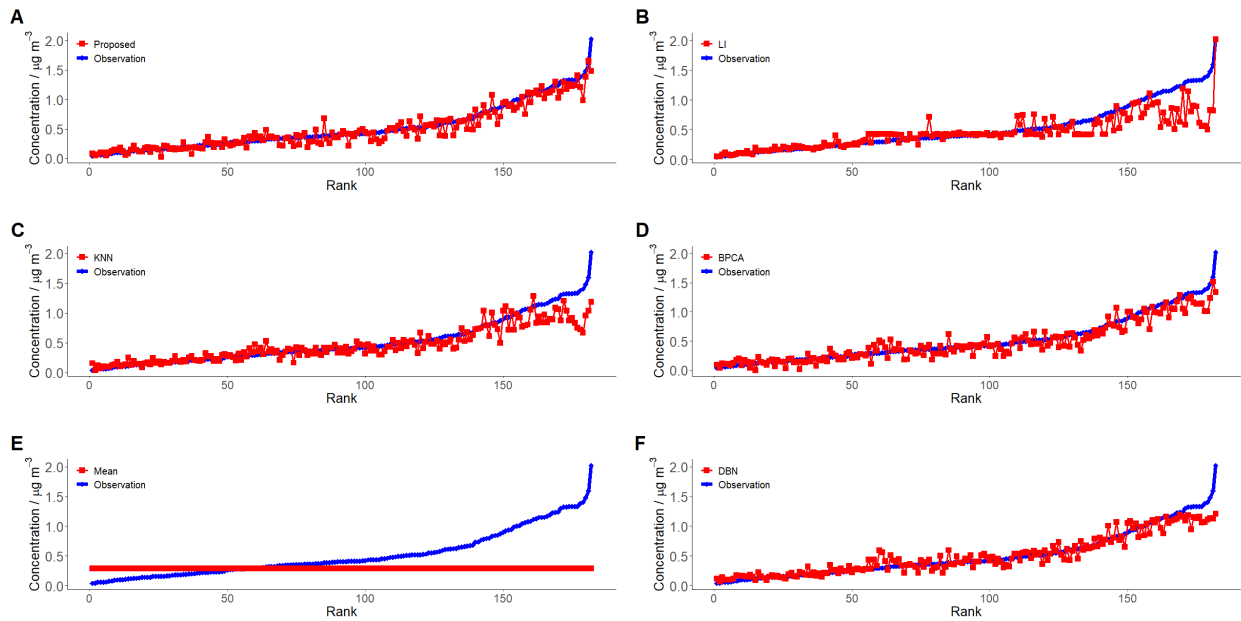

Figure S14. The comparison of imputed values and actual values for Ca under Case 1. Actual and imputed values are ranked according to the actual values. **a** this study; **B** LI; **C** KNN; **D** BPCA; **E** Mean; **F** DBN

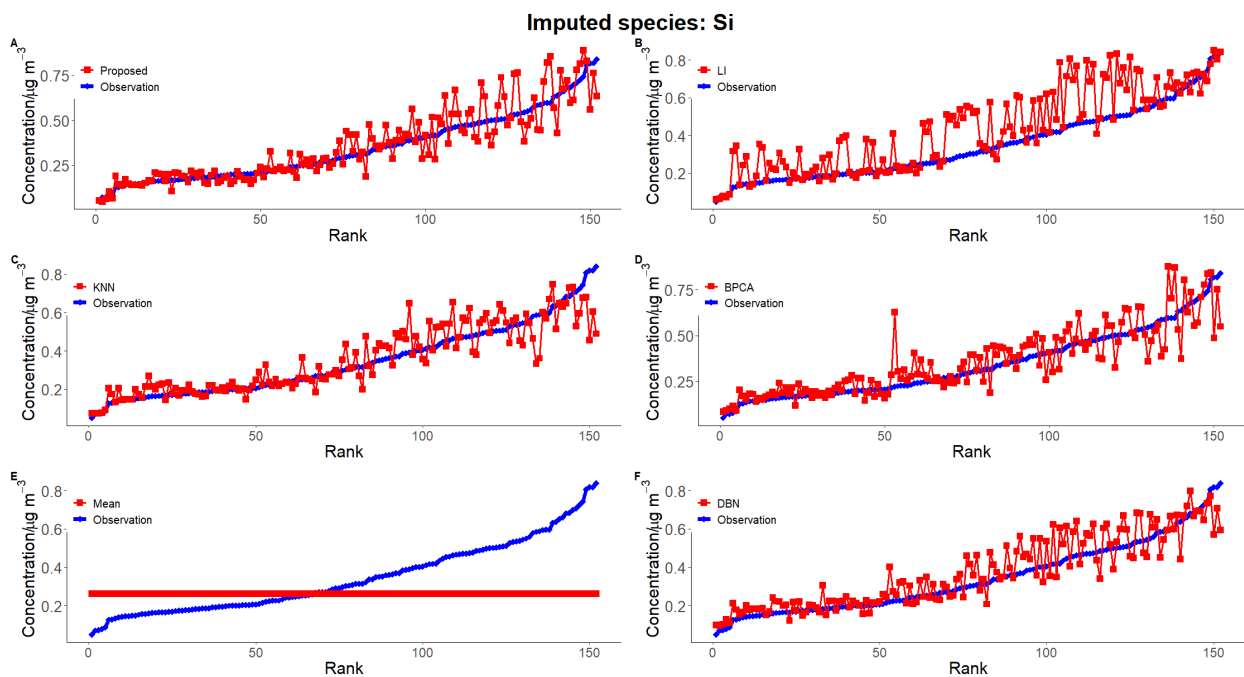

Figure S15. The comparison of imputed values and actual values for Si under Case 1. Actual and imputed values are ranked according to the actual values. **a** this study; **B** LI; **C** KNN; **D** BPCA; **E** Mean; **F** DBN

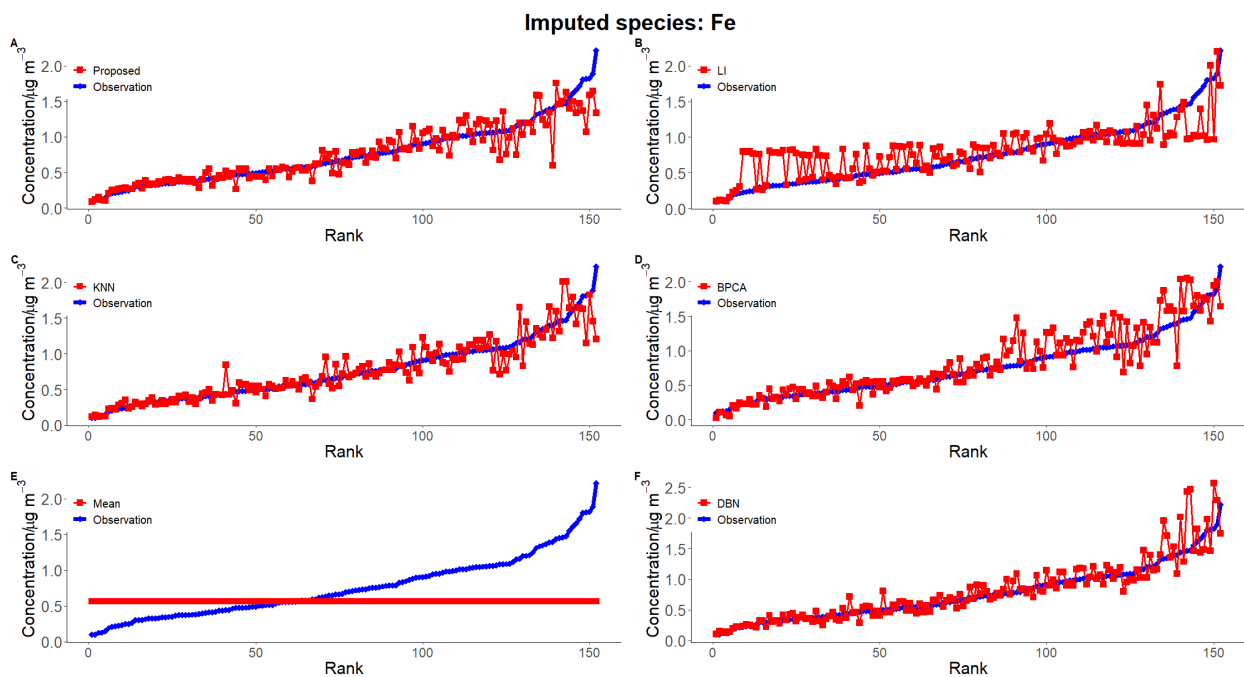

Figure S16. The comparison of imputed values and actual values for  $\text{NO}_3^-$  under Case 1. Actual and imputed values are ranked according to the actual values. **a** this study; **B** LI; **C** KNN; **D** BPCA; **E** Mean; **F** DBN

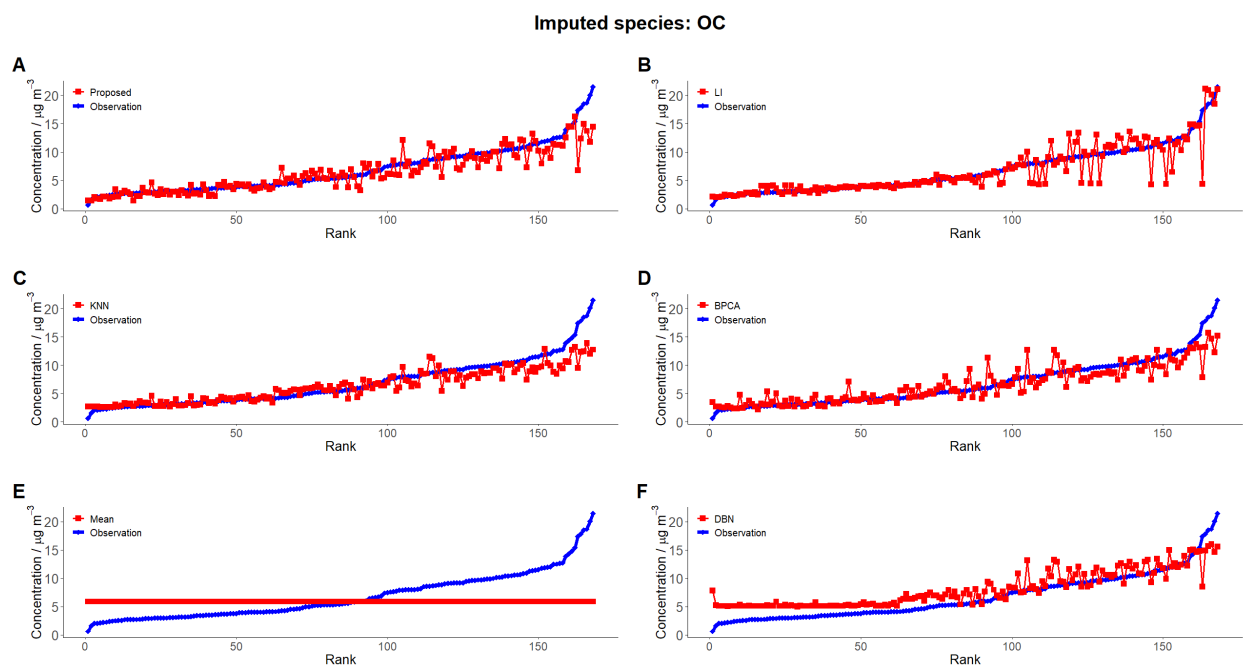

Figure S17. The comparison of imputed values and actual values for OC under Case 1. Actual and imputed values are ranked according to the actual values. **a** this study; **B** LI; **C** KNN; **D** BPCA; **E** Mean; **F** DBN

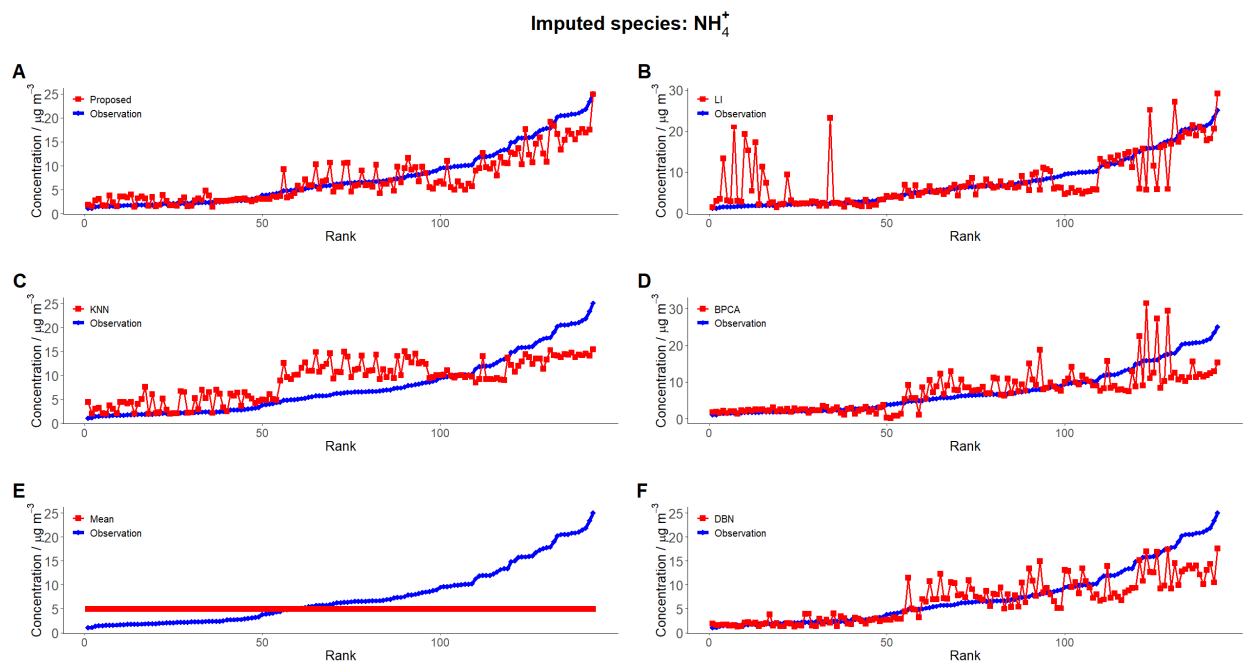

Figure S18. The comparison of imputed values and actual values for NH<sub>4</sub><sup>+</sup> under Case 2(missing proportion: 10%). Actual and imputed values are ranked according to the actual values. **a** this study; **B** LI; **C** KNN; **D** BPCA; **E** Mean; **F** DBN

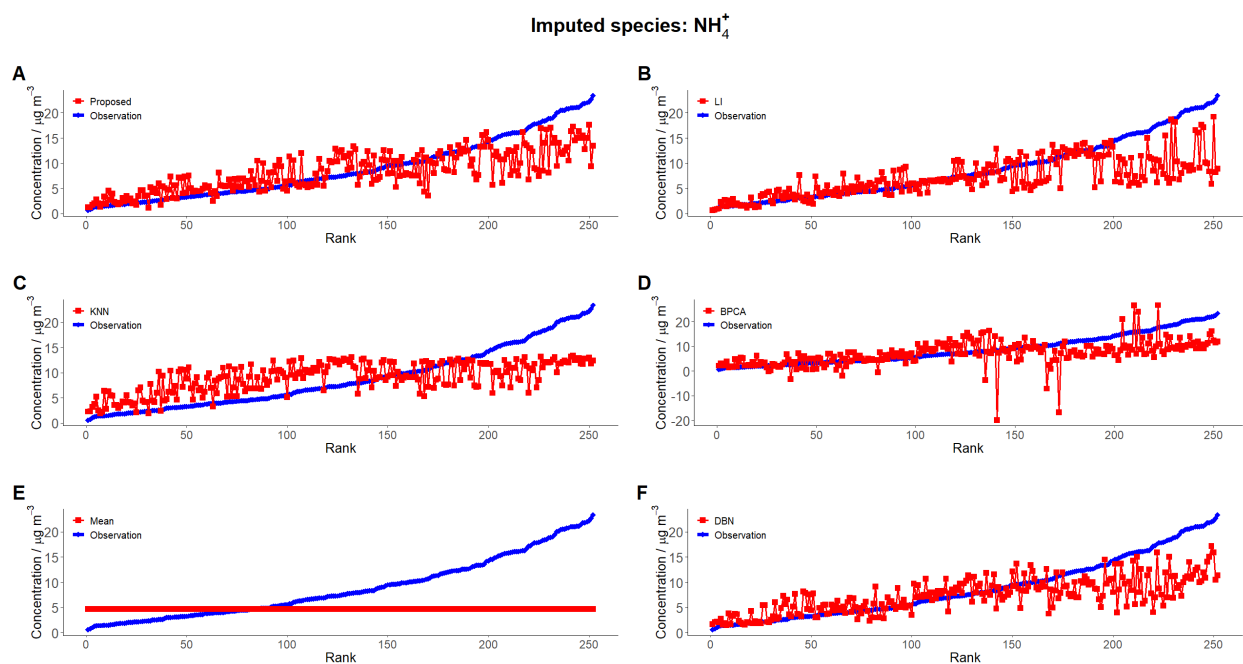

Figure S19. Comparison between the imputed and actual values of  $\text{NH}_4^+$  under Case 2 (missing proportion: 20%). Actual and imputed values are ranked according to the actual values. **a** this study; **b** Mean; **c** LI; **d**) KNN; **e** BPCA; **f** DBN.

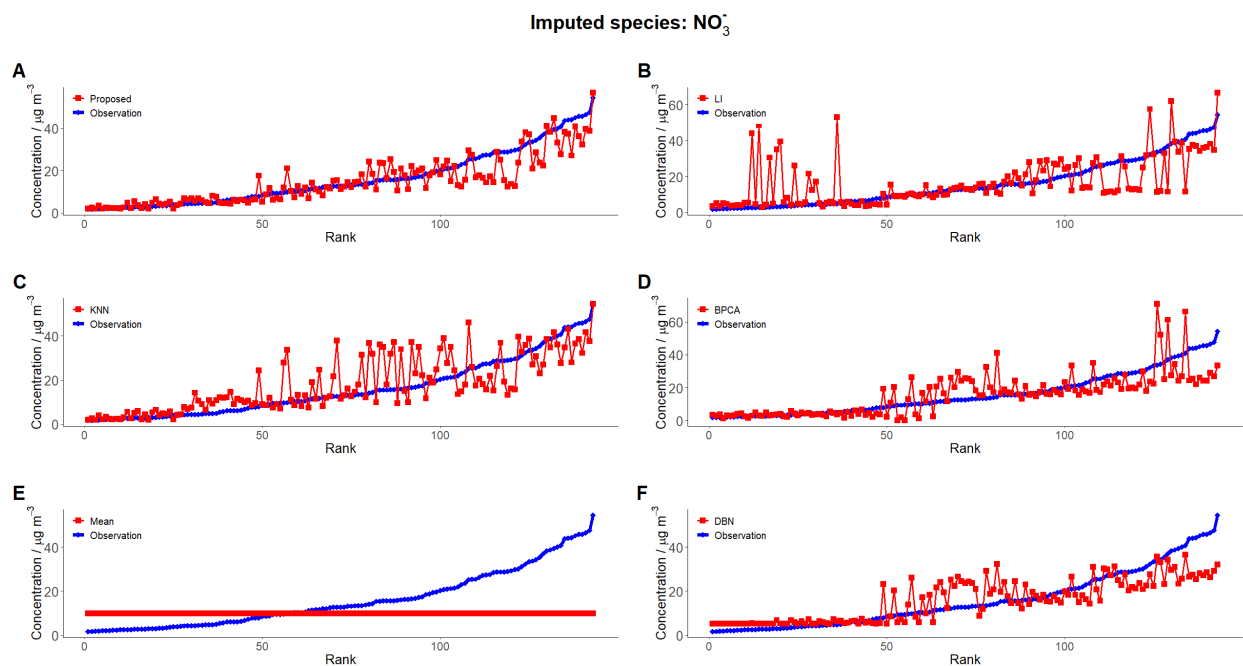

Figure S20. The comparison of imputed values and actual values for  $\text{NO}_3^-$  under Case 2 (missing proportion: 10%). Actual and imputed values are ranked according to the actual values. **a** this study; **B** LI; **C** KNN; **D** BPCA; **E** Mean; **F** DBN

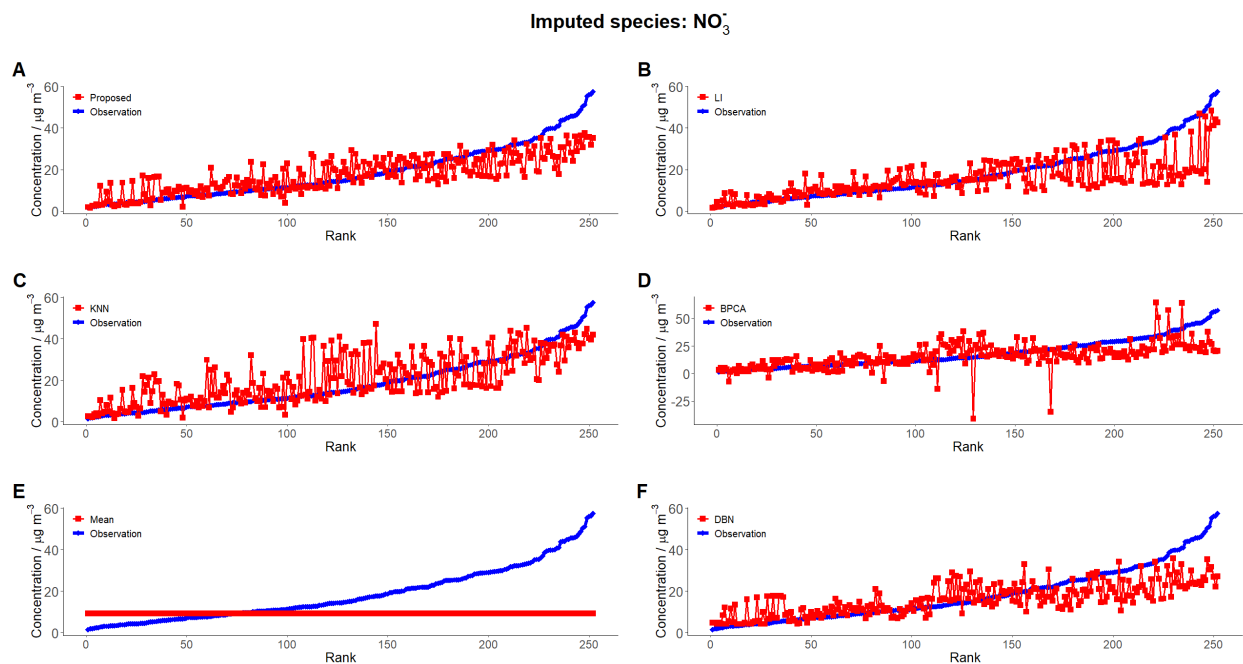

Figure S21. The comparison of imputed values and actual values for  $\text{NO}_3^-$  under Case 2(missing proportion: 20%). Actual and imputed values are ranked according to the actual values. **a** this study; **B** LI; **C** KNN; **D** BPCA; **E** Mean; **F** DBN

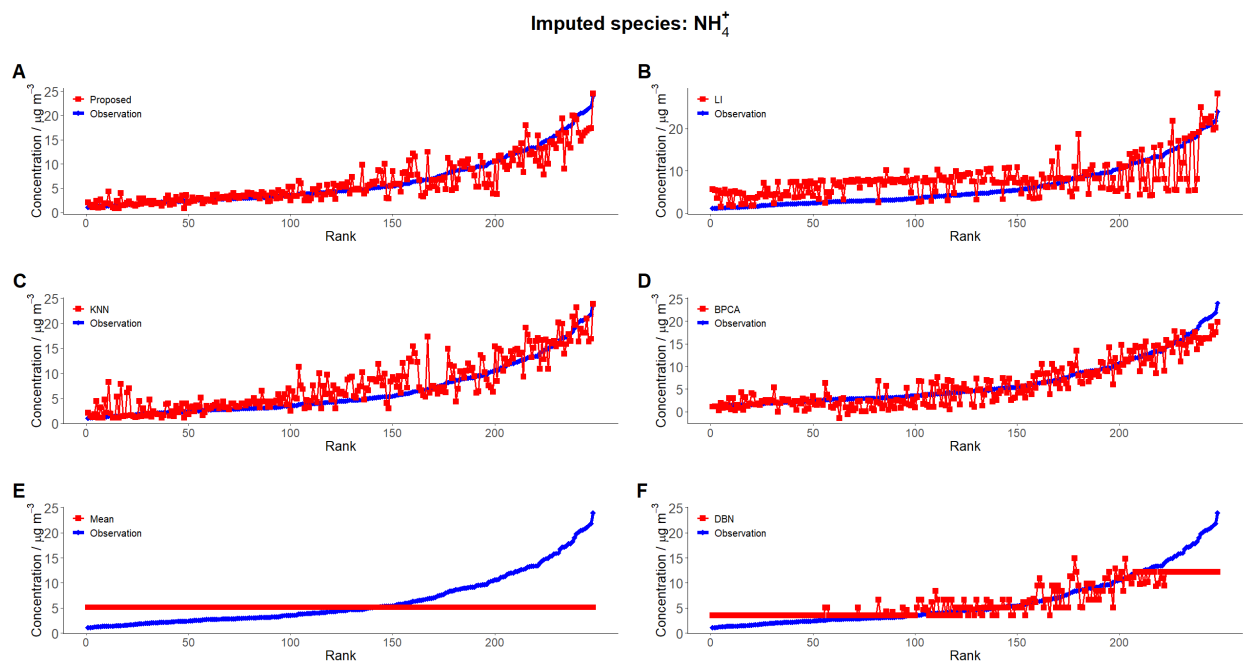

Figure S22. The comparison of imputed values and actual values for  $\text{NH}_4^+$  under Case 4(missing proportion: 20%, MCMS). Actual and imputed values are ranked according to the actual values. **a** this study; **B** LI; **C** KNN; **D** BPCA; **E** Mean; **F** DBN

Imputed species:  $\text{NO}_3^-$

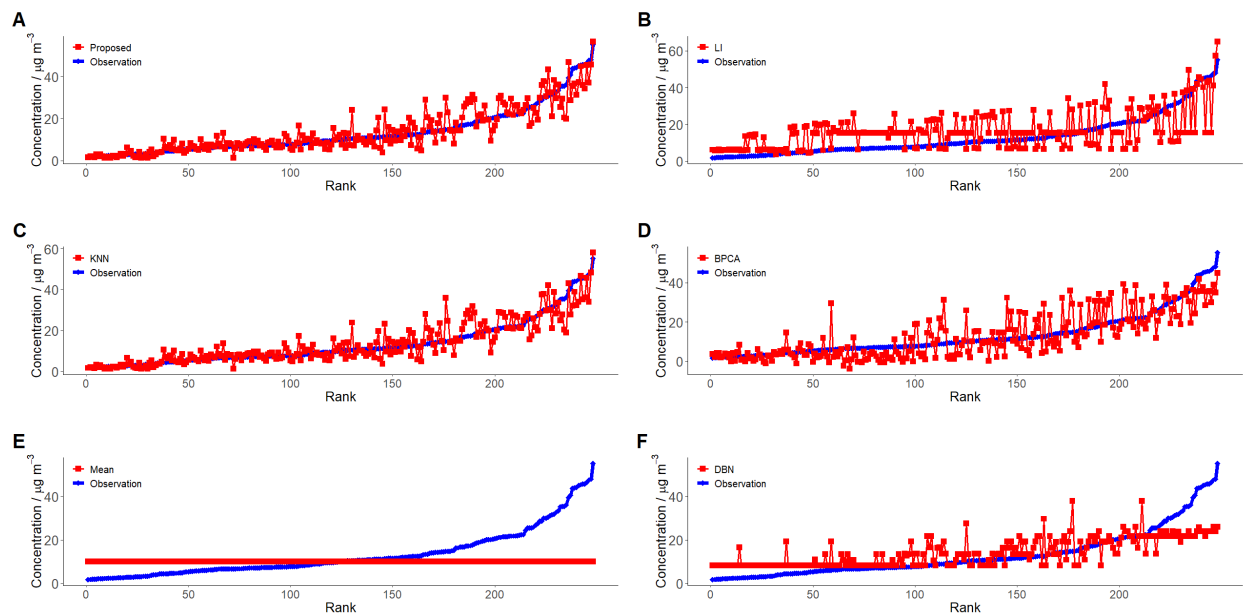

Figure S23. The comparison of imputed values and actual values for  $\text{NO}_3^-$  under Case 4 (missing proportion: 20%, MCMS). Actual and imputed values are ranked according to the actual values. **a** this study; **B** LI; **C** KNN; **D** BPCA; **E** Mean; **F** DBN

Imputed species:  $\text{NH}_4^+$

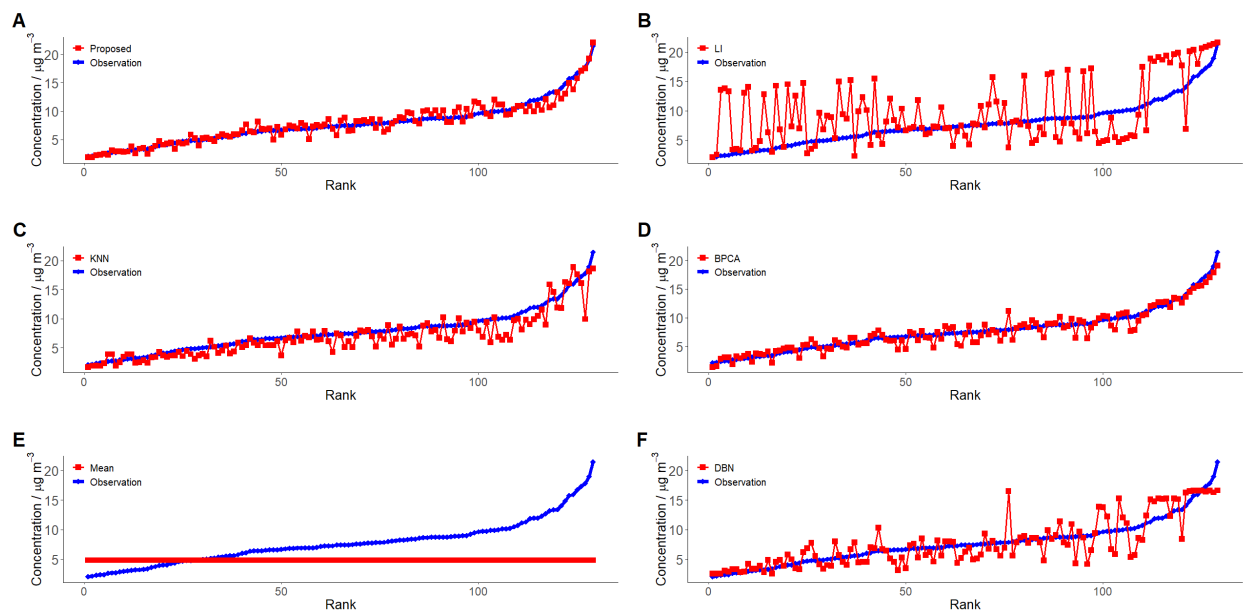

Figure S24. The comparison of imputed values and actual values for  $\text{NH}_4^+$  under Case 4 (missing proportion: 10%, MCMI). Actual and imputed values are ranked according to the actual values. **a** this study; **B** LI; **C** KNN; **D** BPCA; **E** Mean; **F** DBN

Imputed species:  $\text{NO}_3^-$

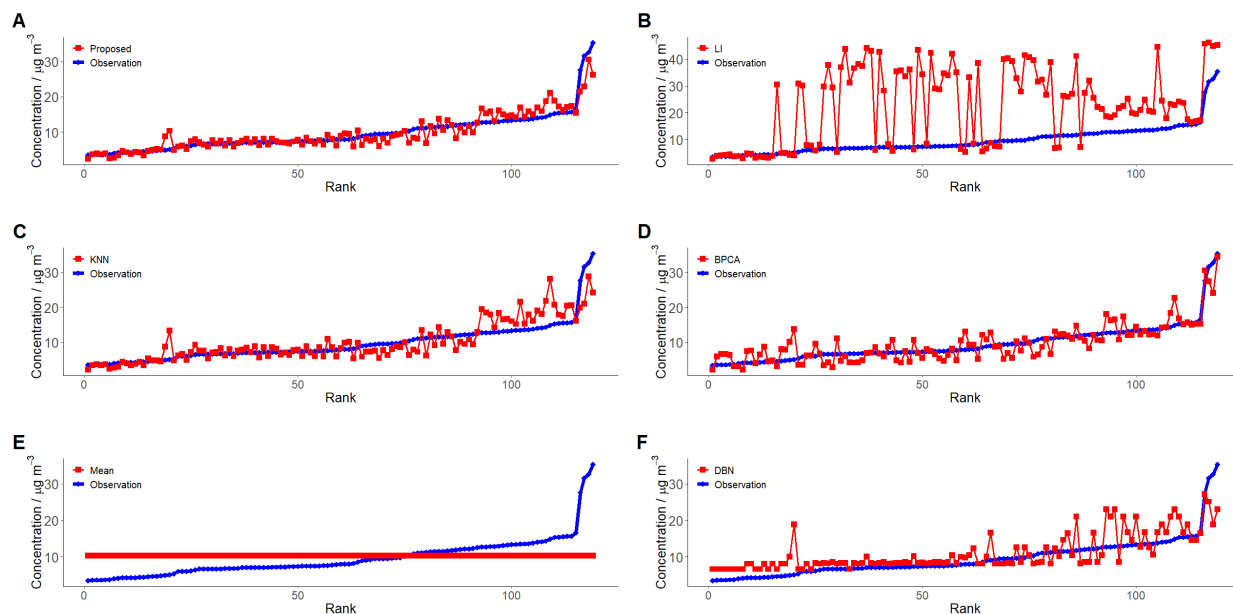

Figure S25. The comparison of imputed values and actual values for  $\text{NO}_3^-$  in Case 4(missing proportion: 10%, MCMI). Actual and imputed values are ranked according to the actual values. **a** this study; **B** LI; **C** KNN; **D** BPCA; **E** Mean; **F** DBN

Imputed species: Ti

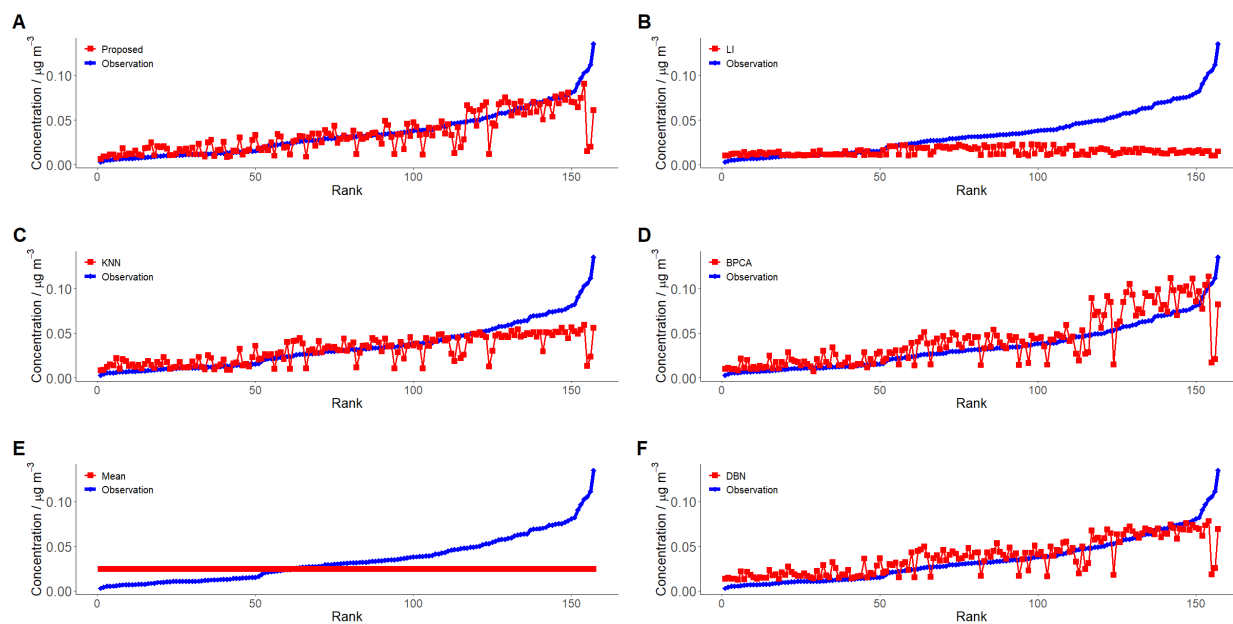

Figure S26. The comparison of imputed values and actual values for Ti in Case 5(missing proportion: 10%, MCMS). Actual and imputed values are ranked according to the actual values. **a** this study; **B** LI; **C** KNN; **D** BPCA; **E** Mean; **F** DBN

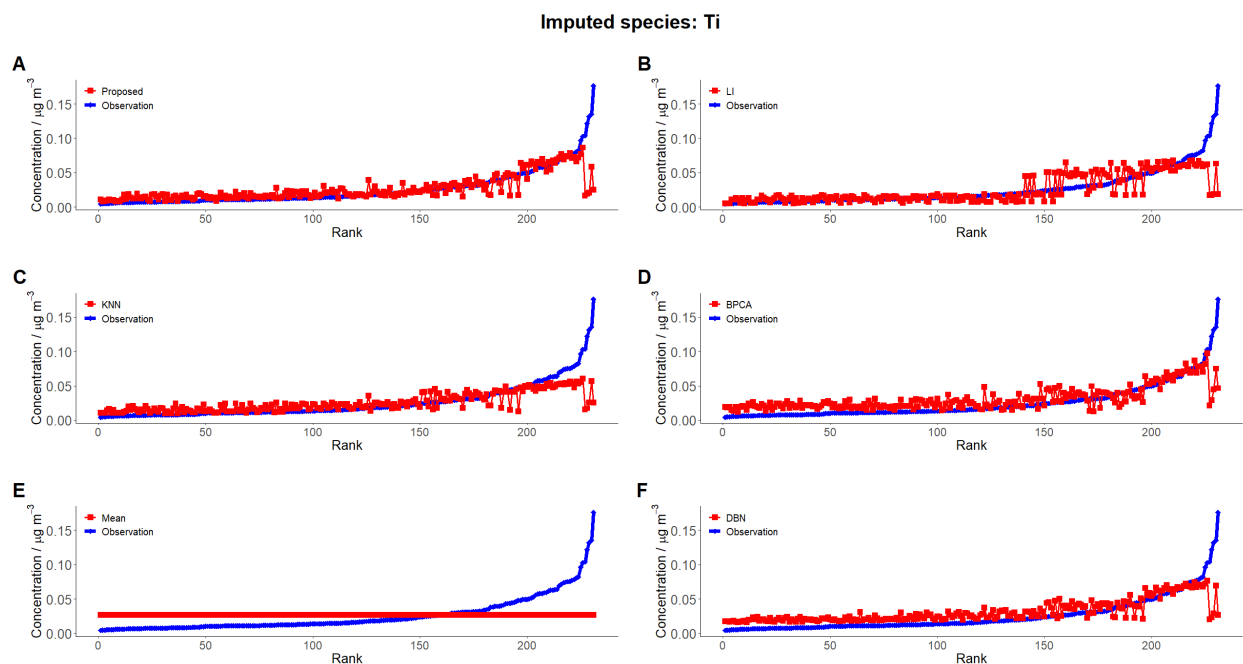

Figure S27. The comparison of imputed values and actual values for Ti in Case 5(missing proportion: 20%, MCMS). Actual and imputed values are ranked according to the actual values. **a** this study; **B** LI; **C** KNN; **D** BPCA; **E** Mean; **F** DBN

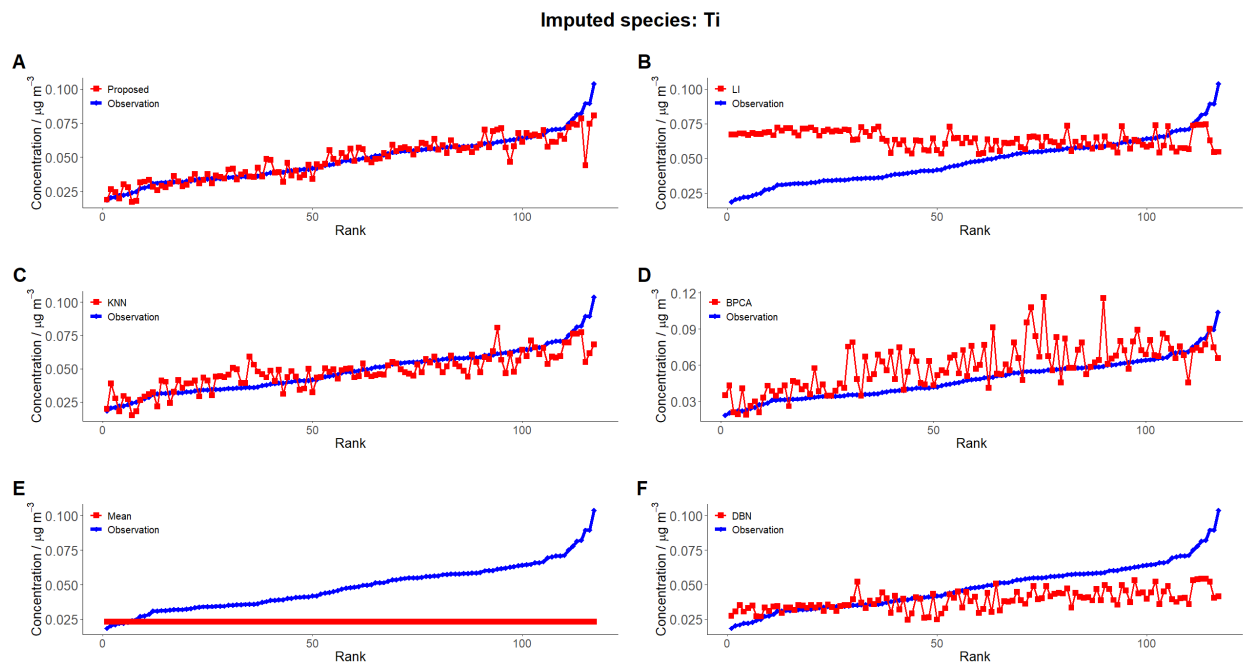

Figure S28. The comparison of imputed values and actual values for Ti in Case 5(missing proportion: 10%, MCMI). Actual and imputed values are ranked according to the actual values. **a** this study; **B** LI; **C** KNN; **D** BPCA; **E** Mean; **F** DBN

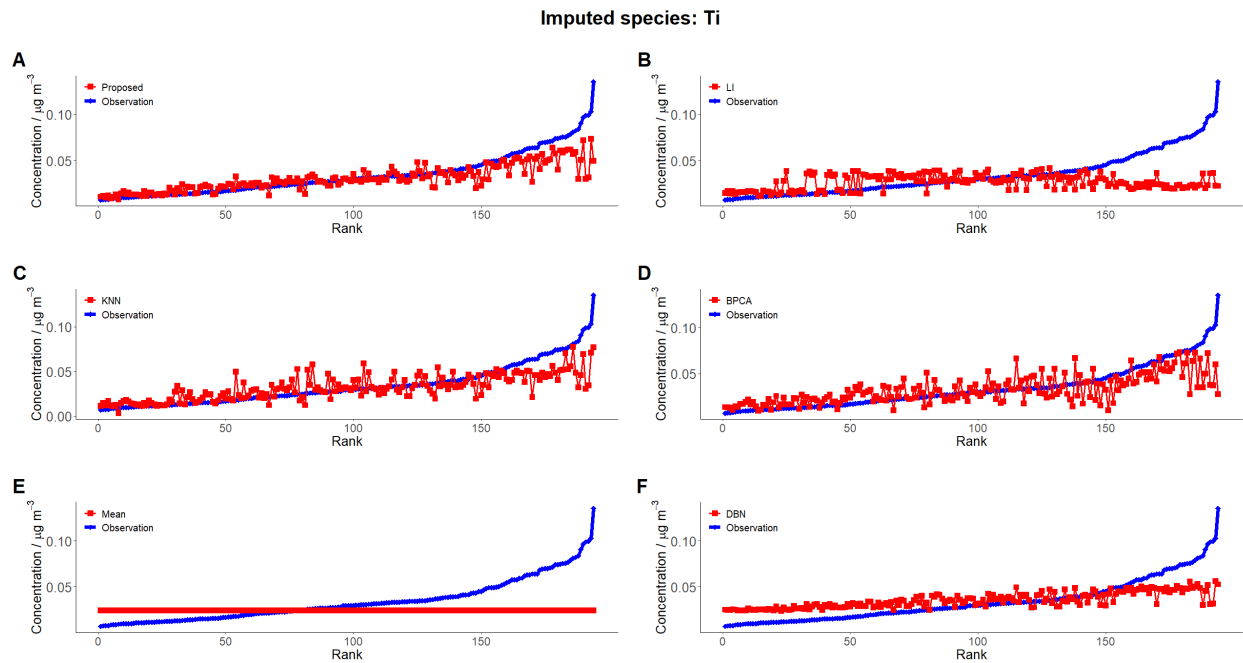

Figure S29. The comparison of imputed values and actual values for Ti in Case 5(missing proportion: 20%, MCM). Actual and imputed values are ranked according to the actual values. **a** this study; **B** LI; **C** KNN; **D** BPCA; **E** Mean; **F** DBN

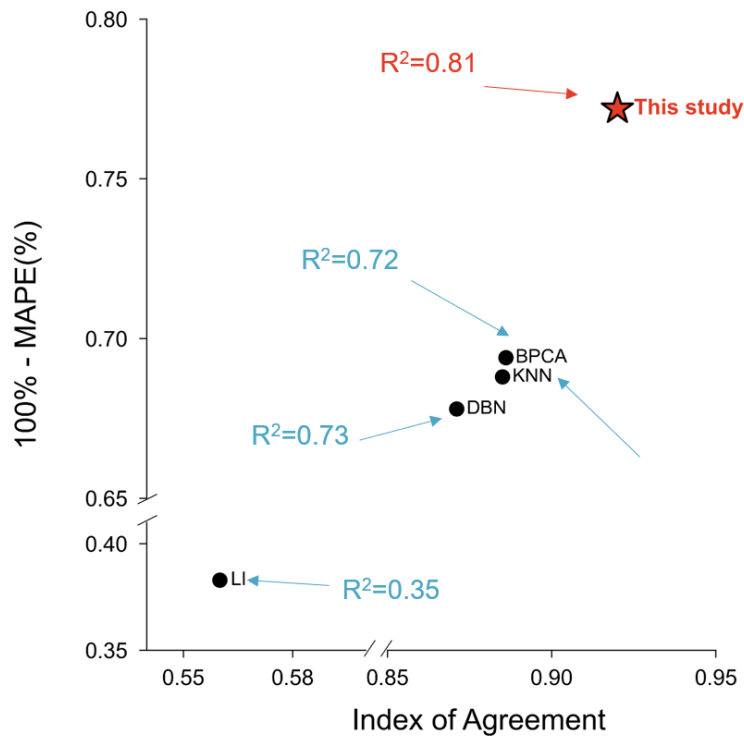

Figure S30. Mean performance of the evaluated imputation methods under all cases.

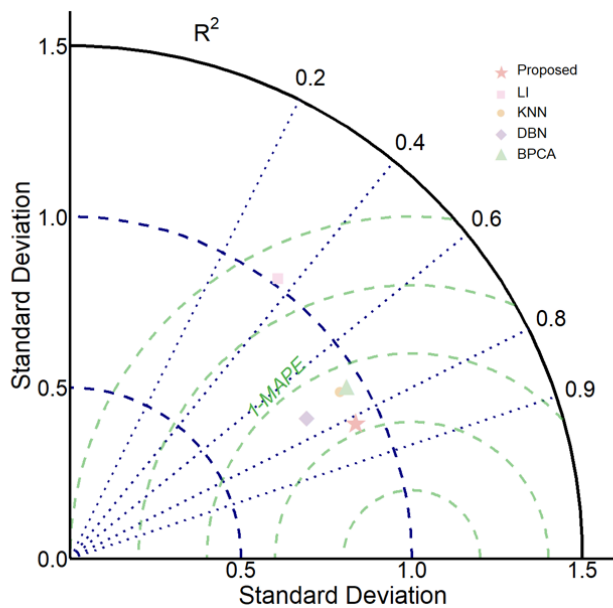

Figure S31. Taylor diagram summarizing the statistical performance of the proposed and baseline imputation models.

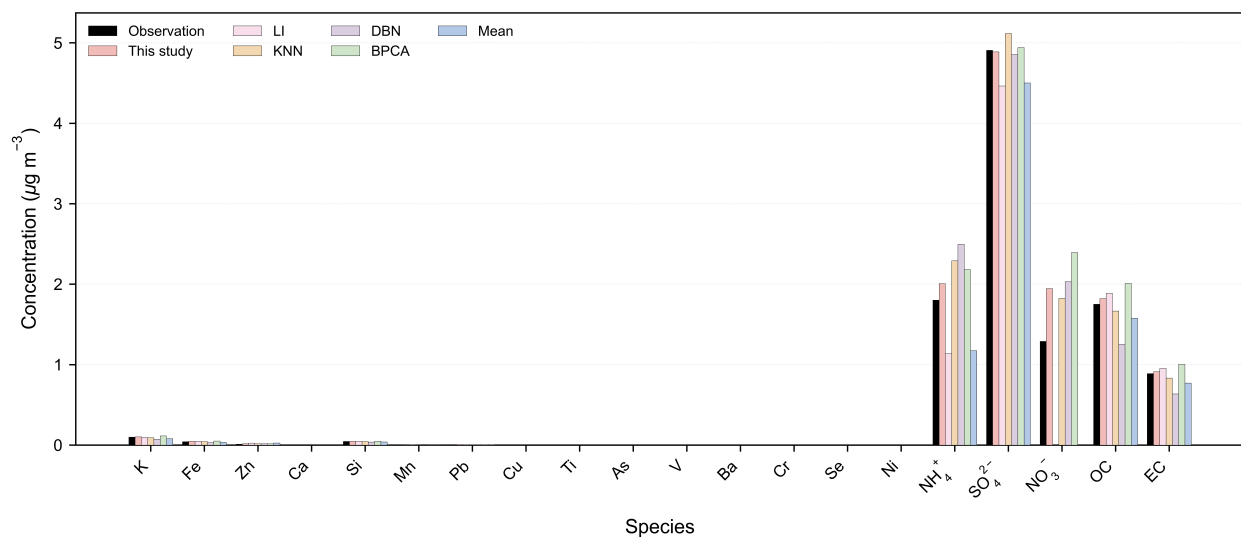

Figure S32. Comparison of PMF-resolved secondary sulfate source profiles derived from datasets completed using different imputation methods and from the complete non-missing dataset under Case 2.

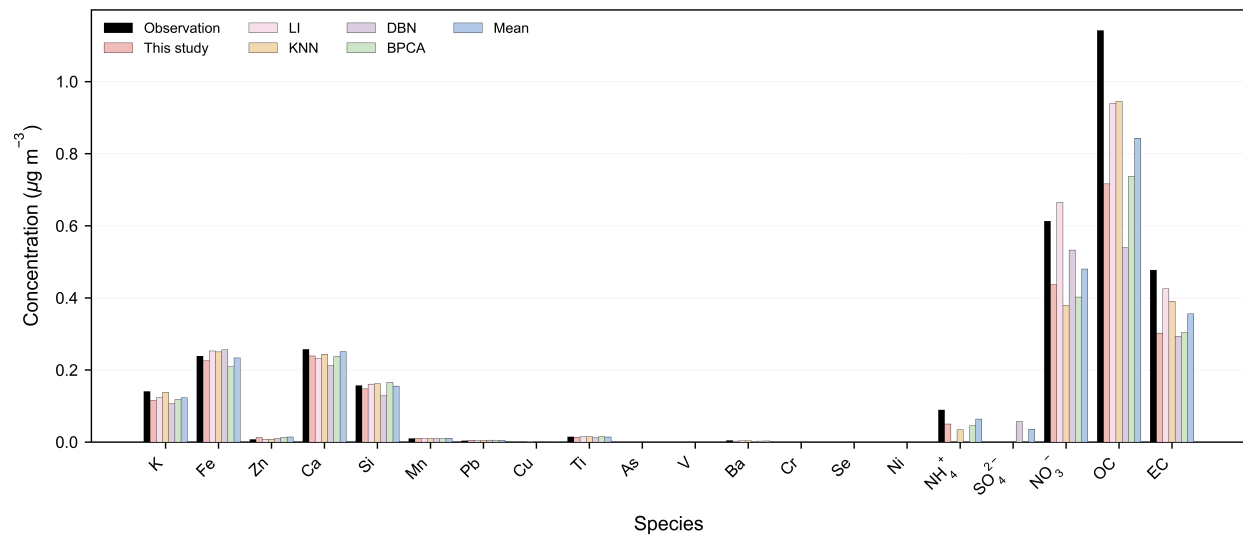

Figure S33. Comparison of PMF-resolved crustal dust source profiles derived from datasets completed using different imputation methods and from the complete non-missing dataset under Case 5.

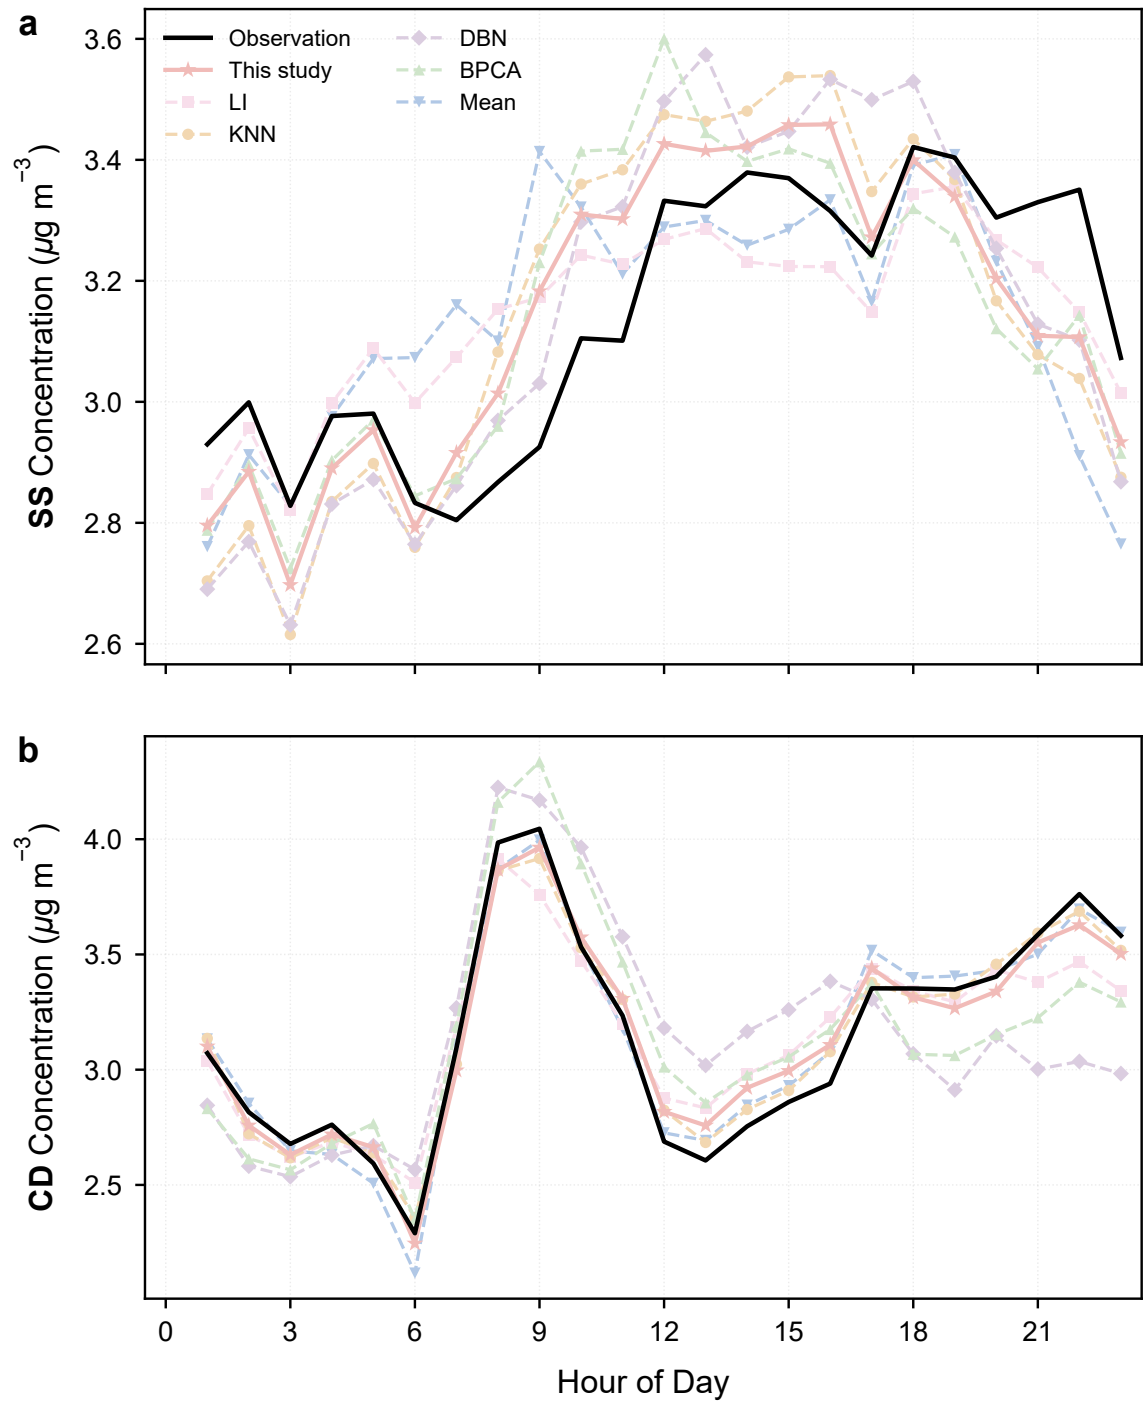

Figure S34. Diurnal variations of PMF-resolved source contributions after imputation for representative cases: (a) secondary sulfate (SS) contribution in Case 2 and (b) crustal dust (CD) contribution in Case 5.

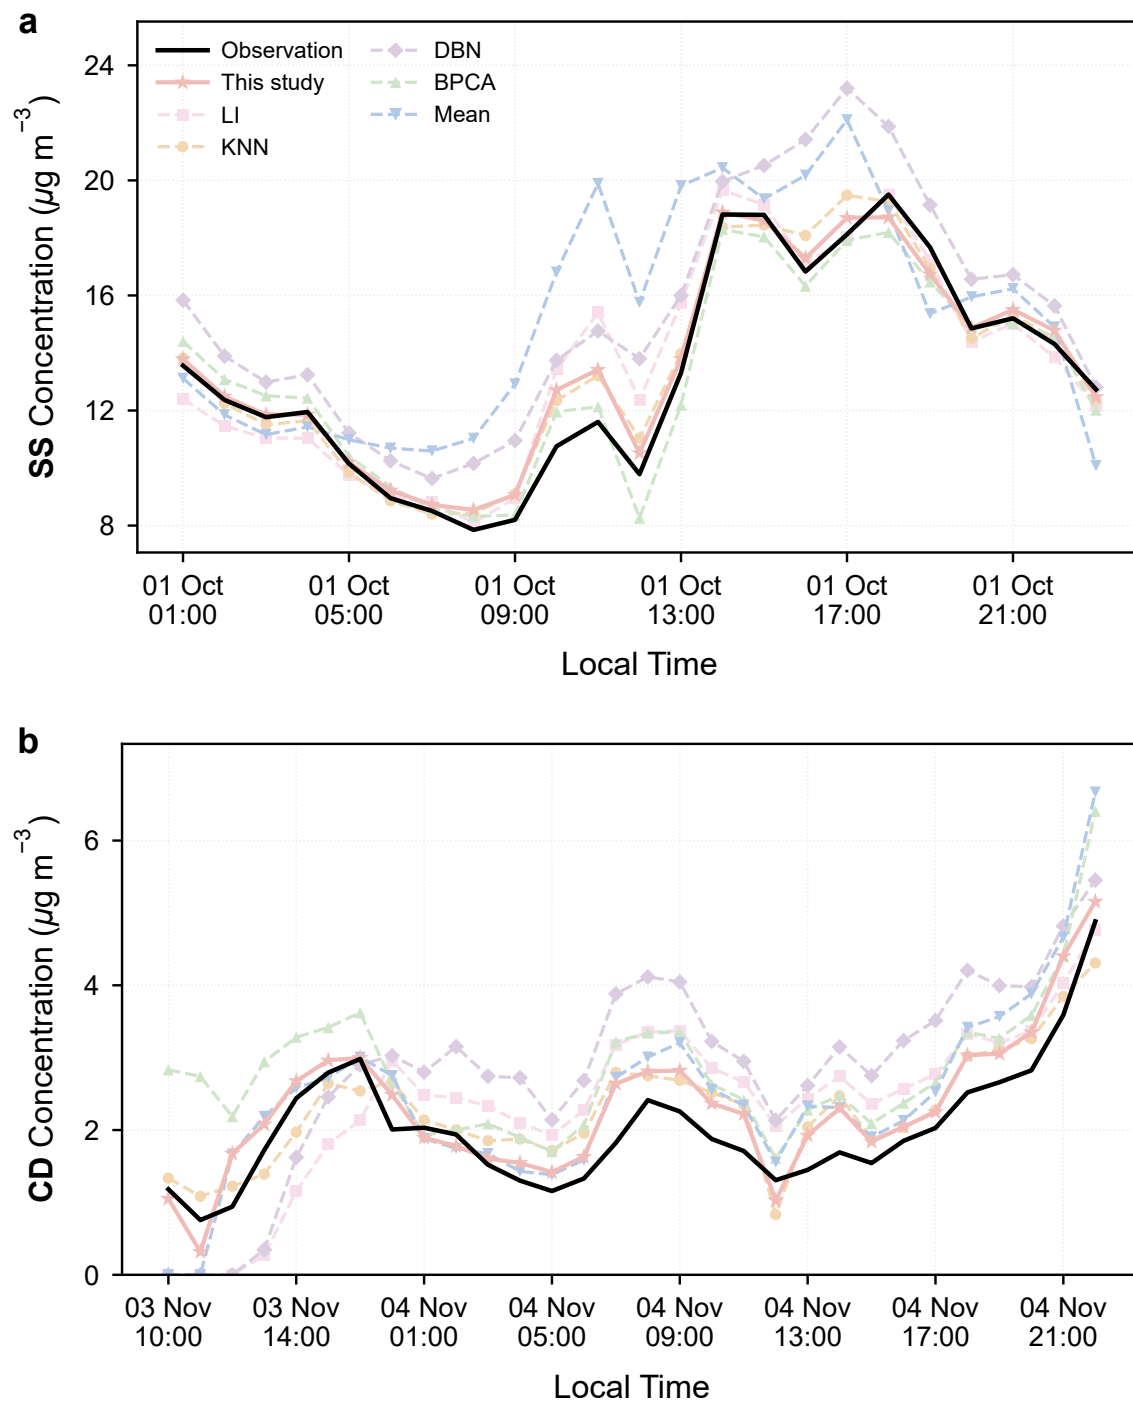

Figure S35. Selected time-series episodes of PMF-resolved source contributions after imputation: (a) secondary sulfate (SS) contribution under  $\text{SO}_4^{2-}$  missingness in Case 2 and (b) crustal dust (CD) contribution under Case 5.

## S3 Supplementary Tables

Table S1. The generation mechanism of gap patterns

| $l = 1$                      | $1 < l \leq 6$              | $7 < l \leq 23$               | $l \geq 24$ |
|------------------------------|-----------------------------|-------------------------------|-------------|
| short gap                    | median gap                  | large gap                     |             |
| $X \sim \text{Exp}(\lambda)$ | $X \sim \mathcal{U}(7, 23)$ | $X \sim \mathcal{U}(23, 115)$ |             |

Table S2. Summary for the missing pattern of the subset of NEPB dataset.  $n_{total}$  refers to the total number of missing data in column, namely per species, and % of  $n_{total}$  refers to the proportion of the categorized gap accounts for in the species.

| gap length | species         |                  |                 |                  |                    |                  |
|------------|-----------------|------------------|-----------------|------------------|--------------------|------------------|
|            | Ca              |                  | Si              |                  | Ti                 |                  |
|            | $n_{gaps}$      | % of $n_{total}$ | $n_{gaps}$      | % of $n_{total}$ | $n_{gaps}$         | % of $n_{total}$ |
| 1-5h       | 6               |                  | 6               |                  | 6                  |                  |
| 6h         | 3               | 20.0             | 3               | 20.0             | 3                  | 20.0             |
| 7-23h      | 3               | 23.4             | 3               | 23.4             | 3                  | 23.4             |
| 24h        | 0               |                  | 0               |                  | 0                  |                  |
| >24h       | 1               | 56.6             | 1               | 56.6             | 1                  | 56.6             |
|            | As              |                  | $\text{NH}_4^+$ |                  | $\text{SO}_4^{2-}$ |                  |
|            | $n_{gaps}$      | % of $n_{total}$ | $n_{gaps}$      | % of $n_{total}$ | $n_{gaps}$         | % of $n_{total}$ |
| 1-5h       | 12              |                  | 12              |                  | 12                 |                  |
| 6h         | 3               | 21.1             | 3               | 25.9             | 4                  | 26.5             |
| 7-23h      | 4               | 26.9             | 3               | 22.3             | 3                  | 22.1             |
| 24h        | 0               |                  | 0               |                  | 0                  |                  |
| >24h       | 1               | 52.0             | 1               | 51.8             | 1                  | 51.3             |
|            | $\text{NO}_3^-$ |                  | OC              |                  | EC                 |                  |
|            | $n_{gaps}$      | % of $n_{total}$ | $n_{gaps}$      | % of $n_{total}$ | $n_{gaps}$         | % of $n_{total}$ |
| 1-5h       | 13              |                  | 11              |                  | 11                 |                  |
| 6h         | 4               | 26.9             | 2               | 15.2             | 2                  | 15.2             |
| 7-23h      | 3               | 22.0             | 3               | 13.4             | 3                  | 13.4             |
| 24h        | 0               |                  | 1               |                  | 1                  |                  |
| >24h       | 1               | 51.1             | 2               | 71.5             | 2                  | 71.5             |

Table S3. Summaries of BS, DISP and BS-DISP error estimation diagnostics and  $Q/Q_{exp}$  values of 4- to 9-factor PMF solutions

|                             | 4-factor | 5-factor | 6-factor | 7-factor | 8-factor | 9-factor |
|-----------------------------|----------|----------|----------|----------|----------|----------|
| <b>BS diagnostics</b>       |          |          |          |          |          |          |
| Lowest %BS mapping          | 97       | 43       | 85       | 93       | 93       | 83       |
| Highest % unmapped          | 0        | 1        | 1        | 2        | 7        | 1        |
| <b>DISP diagnostics</b>     |          |          |          |          |          |          |
| Error Code                  | 0        | 0        | 0        | 0        | 0        | 0        |
| Largest Decrease in Q       | -0.035   | 0        | -0.048   | 0        | 0        | -0.117   |
| %dQ                         | 0        | 0        | 0        | 0        | 0        | 0        |
| Highest swap by factor      | 0        | 0        | 0        | 0        | 0        | 0        |
| <b>BS-DISP diagnostics</b>  |          |          |          |          |          |          |
| Number of cases accepted    | 100      | 92       | 95       | 87       | 99       | 87       |
| % of cases accepted         | 100      | 92       | 95       | 87       | 99       | 87       |
| Largest Decrease in Q       | -12.657  | -31.180  | -43.780  | -22.987  | -1.754   | -28.813  |
| %dQ                         | -0.012   | -0.03    | -0.063   | -0.040   | -0.004   | -0.073   |
| Number of decreases in Q    | 0        | 1        | 3        | 7        | 0        | 2        |
| Number of swaps in best fit | 0        | 0        | 2        | 2        | 1        | 1        |
| Number of swaps in DISP     | 0        | 2        | 0        | 4        | 0        | 10       |
| Highest swaps by factor     | 0        | 4        | 2        | 3        | 1        | 1        |
| $Q/Q_{exp}$                 | 6.64     | 5.98     | 5.18     | 4.60     | 4.21     | 3.76     |

Table S4. The squared correlation coefficients between the model-predicted species and actual observations

| Element      | Ca              | V                  | Mn              | As   | Ni   | Ba   | Pb   |
|--------------|-----------------|--------------------|-----------------|------|------|------|------|
|              | 0.92            | 0.91               | 0.86            | 0.70 | 0.62 | 0.76 | 0.61 |
| Bulk species | $\text{NH}_4^+$ | $\text{SO}_4^{2-}$ | $\text{NO}_3^-$ | OC   | EC   |      |      |
|              | 0.98            | 0.86               | 0.88            | 0.79 | 0.82 |      |      |

Table S5. Performance metrics of the imputation methods under Case 1

| Species            | % of missing | Method   | R <sup>2</sup> | IoA  | MAPE(%) |
|--------------------|--------------|----------|----------------|------|---------|
| $\text{NH}_4^+$    | 15           | Proposed | 0.96           | 0.99 | 10.63   |
|                    |              | Linear   | 0.91           | 0.98 | 18.17   |
|                    |              | KNN      | 0.94           | 0.98 | 14.96   |
|                    |              | DBN      | 0.94           | 0.98 | 20.12   |
|                    |              | BPCA     | 0.92           | 0.97 | 21.63   |
| $\text{NO}_3^-$    | 15           | Proposed | 0.91           | 0.97 | 26.64   |
|                    |              | Linear   | 0.35           | 0.82 | 28.69   |
|                    |              | KNN      | 0.84           | 0.95 | 33.62   |
|                    |              | DBN      | 0.86           | 0.98 | 55.44   |
|                    |              | BPCA     | 0.89           | 0.97 | 29.77   |
| $\text{SO}_4^{2-}$ | 15           | Proposed | 0.79           | 0.92 | 15.09   |
|                    |              | Linear   | 0.49           | 0.79 | 28.33   |
|                    |              | KNN      | 0.79           | 0.94 | 17.04   |
|                    |              | DBN      | 0.83           | 0.96 | 19.81   |
|                    |              | BPCA     | 0.61           | 0.87 | 31.68   |
| Ca                 | 15           | Proposed | 0.93           | 0.98 | 13.97   |
|                    |              | Linear   | 0.73           | 0.88 | 22.05   |
|                    |              | KNN      | 0.84           | 0.94 | 18.33   |
|                    |              | DBN      | 0.90           | 0.97 | 21.84   |
|                    |              | BPCA     | 0.91           | 0.97 | 24.00   |
| Si                 | 15           | Proposed | 0.82           | 0.95 | 17.17   |
|                    |              | Linear   | 0.74           | 0.87 | 33.42   |
|                    |              | KNN      | 0.79           | 0.94 | 16.43   |
|                    |              | DBN      | 0.82           | 0.94 | 21.30   |
|                    |              | BPCA     | 0.76           | 0.93 | 20.90   |
| Fe                 | 15           | Proposed | 0.83           | 0.95 | 13.21   |
|                    |              | Linear   | 0.62           | 0.86 | 34.23   |
|                    |              | KNN      | 0.84           | 0.96 | 13.54   |
|                    |              | DBN      | 0.86           | 0.96 | 14.79   |
|                    |              | BPCA     | 0.84           | 0.94 | 19.35   |
| OC                 | 15           | Proposed | 0.81           | 0.94 | 17.42   |
|                    |              | Linear   | 0.80           | 0.94 | 14.29   |

Table S5 (continued)

| Species | % of missing | Method   | R <sup>2</sup> | IoA  | MAPE(%) |
|---------|--------------|----------|----------------|------|---------|
| EC      | 15           | KNN      | 0.86           | 0.93 | 17.68   |
|         |              | DBN      | 0.83           | 0.90 | 45.14   |
|         |              | BPCA     | 0.81           | 0.93 | 19.43   |
|         |              | Proposed | 0.82           | 0.95 | 15.53   |
|         |              | Linear   | 0.64           | 0.89 | 23.32   |
|         |              | KNN      | 0.87           | 0.93 | 13.89   |
|         |              | DBN      | 0.86           | 0.96 | 12.53   |
|         |              | BPCA     | 0.80           | 0.94 | 16.53   |

Table S6. Performance metrics of the imputation methods under Cases 2 and 3.

| Species                       | % of Missing | Case | Method   | R <sup>2</sup> | IoA  | MAPE(%) |
|-------------------------------|--------------|------|----------|----------------|------|---------|
| NH <sub>4</sub> <sup>+</sup>  | 10           | 2    | Proposed | 0.85           | 0.95 | 30.66   |
|                               |              |      | Linear   | 0.53           | 0.86 | 70.93   |
|                               |              |      | KNN      | 0.56           | 0.62 | 66.02   |
|                               |              |      | DBN      | 0.67           | 0.87 | 30.05   |
|                               |              |      | BPCA     | 0.52           | 0.84 | 34.59   |
|                               |              |      | Proposed | 0.74           | 0.83 | 40.98   |
| SO <sub>4</sub> <sup>2-</sup> |              |      | Linear   | 0.64           | 0.89 | 59.35   |
|                               |              |      | KNN      | 0.59           | 0.85 | 61.63   |
|                               |              |      | DBN      | 0.63           | 0.78 | 44.43   |
|                               |              |      | BPCA     | 0.43           | 0.75 | 49.08   |
|                               |              |      | Proposed | 0.81           | 0.94 | 27.09   |
|                               |              |      | Linear   | 0.37           | 0.79 | 95.53   |
| NO <sub>3</sub> <sup>-</sup>  |              |      | KNN      | 0.60           | 0.87 | 49.42   |
|                               |              |      | DBN      | 0.66           | 0.88 | 48.75   |
|                               |              |      | BPCA     | 0.53           | 0.85 | 41.45   |
|                               |              |      | Proposed | 0.61           | 0.84 | 38.05   |
|                               |              |      | Linear   | 0.50           | 0.75 | 29.61   |
|                               |              |      | KNN      | 0.40           | 0.69 | 67.67   |
| NH <sub>4</sub> <sup>+</sup>  | 20           |      | DBN      | 0.52           | 0.75 | 37.92   |
|                               |              |      | BPCA     | 0.26           | 0.66 | 52.40   |
|                               |              |      | Proposed | 0.36           | 0.59 | 45.01   |
|                               |              |      | Linear   | 0.57           | 0.71 | 41.67   |
|                               |              |      | KNN      | 0.26           | 0.68 | 69.34   |
|                               |              |      | DBN      | 0.34           | 0.52 | 52.09   |
| SO <sub>4</sub> <sup>2-</sup> |              |      | BPCA     | 0.13           | 0.47 | 61.83   |
|                               |              |      | Proposed | 0.67           | 0.86 | 38.90   |
|                               |              |      | Linear   | 0.51           | 0.80 | 33.70   |
|                               |              |      | KNN      | 0.53           | 0.84 | 57.11   |
|                               |              |      | DBN      | 0.53           | 0.77 | 44.71   |
|                               |              |      | BPCA     | 0.31           | 0.72 | 52.86   |
| NO <sub>3</sub> <sup>-</sup>  |              |      | Proposed | 0.73           | 0.92 | 19.25   |
|                               |              |      | Linear   | 0.34           | 0.74 | 31.32   |
|                               |              |      | KNN      | 0.68           | 0.89 | 25.89   |
|                               |              |      | DBN      | 0.74           | 0.92 | 22.51   |
|                               |              |      | BPCA     | 0.66           | 0.86 | 29.95   |
|                               |              |      | Proposed | 0.84           | 0.96 | 13.14   |
| OC                            | 10           | 3    | Linear   | 0.24           | 0.71 | 46.02   |
|                               |              |      | KNN      | 0.79           | 0.94 | 13.89   |
|                               |              |      | DBN      | 0.80           | 0.91 | 18.66   |
|                               |              |      | BPCA     | 0.85           | 0.93 | 19.03   |
|                               |              |      | Proposed | 0.74           | 0.92 | 21.24   |
|                               |              |      | Linear   | 0.61           | 0.87 | 20.99   |
| EC                            | 20           |      | KNN      | 0.71           | 0.87 | 28.07   |
|                               |              |      | DBN      | 0.76           | 0.92 | 22.54   |
|                               |              |      | BPCA     | 0.64           | 0.86 | 27.88   |
|                               |              |      | Proposed | 0.83           | 0.95 | 13.96   |
|                               |              |      | Linear   | 0.72           | 0.92 | 18.34   |
|                               |              |      | KNN      | 0.82           | 0.94 | 13.84   |
| OC                            | 30           |      | DBN      | 0.85           | 0.94 | 15.46   |
|                               |              |      | BPCA     | 0.79           | 0.93 | 18.89   |
|                               |              |      | Proposed | 0.68           | 0.88 | 19.47   |
|                               |              |      | Linear   | 0.54           | 0.85 | 29.54   |
|                               |              |      | KNN      | 0.67           | 0.90 | 23.40   |
|                               |              |      | DBN      | 0.71           | 0.91 | 19.68   |

Table S6 (continued)

| Species | % of Missing | Case | Method   | R <sup>2</sup> | IoA  | MAPE(%) |
|---------|--------------|------|----------|----------------|------|---------|
| EC      |              |      | BPCA     | 0.57           | 0.86 | 24.71   |
|         |              |      | Proposed | 0.80           | 0.94 | 16.51   |
|         |              |      | Linear   | 0.48           | 0.81 | 32.10   |
|         |              |      | KNN      | 0.75           | 0.93 | 15.89   |
|         |              |      | DBN      | 0.84           | 0.95 | 13.00   |
|         |              |      | BPCA     | 0.78           | 0.94 | 18.73   |

Table S7. Performance metrics of the imputation methods under Case 4.

| Species                      | % of Missing | MCMI or MCMS | Method   | R <sup>2</sup> | IoA   | MAPE(%) |
|------------------------------|--------------|--------------|----------|----------------|-------|---------|
| NH <sub>4</sub> <sup>+</sup> | 10           | MCMS         | Proposed | 0.92           | 0.95  | 20.67   |
|                              |              |              | Linear   | 0.74           | 0.87  | 53.23   |
|                              |              |              | KNN      | 0.88           | 0.96  | 24.00   |
|                              |              |              | DBN      | 0.91           | 0.95  | 24.67   |
|                              |              |              | BPCA     | 0.93           | 0.97  | 22.13   |
| NO <sub>3</sub> <sup>-</sup> |              |              | Proposed | 0.85           | 0.95  | 23.92   |
|                              |              |              | Linear   | 0.70           | 0.86  | 43.88   |
|                              |              |              | KNN      | 0.83           | 0.94  | 23.84   |
|                              |              |              | DBN      | 0.88           | 0.88  | 39.81   |
|                              |              |              | BPCA     | 0.86           | 0.96  | 36.14   |
| NH <sub>4</sub> <sup>+</sup> | 20           | MCMS         | Proposed | 0.83           | 0.95  | 25.87   |
|                              |              |              | Linear   | 0.48           | 0.80  | 87.64   |
|                              |              |              | KNN      | 0.79           | 0.93  | 45.33   |
|                              |              |              | DBN      | 0.78           | 0.90  | 42.45   |
|                              |              |              | BPCA     | 0.85           | 0.96  | 36.85   |
| NO <sub>3</sub> <sup>-</sup> |              |              | Proposed | 0.81           | 0.95  | 28.46   |
|                              |              |              | Linear   | 0.41           | 0.77  | 91.45   |
|                              |              |              | KNN      | 0.79           | 0.94  | 29.27   |
|                              |              |              | DBN      | 0.53           | 0.78  | 67.21   |
|                              |              |              | BPCA     | 0.62           | 0.88  | 56.23   |
| NH <sub>4</sub> <sup>+</sup> | 10           | MCMI         | Proposed | 0.93           | 0.98  | 9.57    |
|                              |              |              | Linear   | 0.31           | 0.69  | 63.88   |
|                              |              |              | KNN      | 0.85           | 0.95  | 16.43   |
|                              |              |              | DBN      | 0.72           | 0.92  | 22.14   |
|                              |              |              | BPCA     | 0.92           | 0.98  | 12.86   |
| NO <sub>3</sub> <sup>-</sup> |              |              | Proposed | 0.84           | 0.95  | 14.82   |
|                              |              |              | Linear   | 0.15           | -0.01 | 162.09  |
|                              |              |              | KNN      | 0.69           | 0.91  | 21.98   |
|                              |              |              | DBN      | 0.57           | 0.84  | 34.34   |
|                              |              |              | BPCA     | 0.76           | 0.93  | 27.68   |
| NH <sub>4</sub> <sup>+</sup> | 20           | MCMI         | Proposed | 0.95           | 0.98  | 13.63   |
|                              |              |              | Linear   | 0.00           | 0.23  | 54.07   |
|                              |              |              | KNN      | 0.72           | 0.91  | 35.28   |
|                              |              |              | DBN      | 0.84           | 0.96  | 22.07   |
|                              |              |              | BPCA     | 0.95           | 0.98  | 15.42   |
| NO <sub>3</sub> <sup>-</sup> |              |              | Proposed | 0.74           | 0.90  | 22.81   |
|                              |              |              | Linear   | 0.12           | 0.57  | 80.46   |
|                              |              |              | KNN      | 0.67           | 0.88  | 25.61   |
|                              |              |              | DBN      | 0.54           | 0.82  | 47.62   |
|                              |              |              | BPCA     | 0.73           | 0.92  | 32.61   |

Table S8. Performance metrics of the imputation methods under Case 5.

| Species | % of Missing | MCMI or MCMS | Method   | R <sup>2</sup> | IoA   | MAPE(%) |
|---------|--------------|--------------|----------|----------------|-------|---------|
| Fe      | 10           | MCMS         | Proposed | 0.90           | 0.93  | 25.83   |
|         |              |              | Linear   | 0.16           | -0.24 | 57.18   |
|         |              |              | KNN      | 0.69           | 0.78  | 53.78   |
|         |              |              | DBN      | 0.77           | 0.93  | 31.88   |
|         |              |              | BPCA     | 0.90           | 0.96  | 26.58   |
| Ca      | 10           | MCMS         | Proposed | 0.84           | 0.95  | 53.84   |
|         |              |              | Linear   | 0.06           | -0.02 | 63.88   |
|         |              |              | KNN      | 0.72           | 0.85  | 79.88   |
|         |              |              | DBN      | 0.83           | 0.95  | 46.35   |
|         |              |              | BPCA     | 0.87           | 0.96  | 56.30   |
| Si      | 10           | MCMS         | Proposed | 0.83           | 0.92  | 31.88   |
|         |              |              | Linear   | 0.01           | -0.24 | 43.74   |
|         |              |              | KNN      | 0.77           | 0.91  | 30.26   |
|         |              |              | DBN      | 0.86           | 0.95  | 24.42   |
|         |              |              | BPCA     | 0.84           | 0.89  | 38.23   |
| Ti      | 10           | MCMS         | Proposed | 0.62           | 0.88  | 35.93   |
|         |              |              | Linear   | 0.02           | -0.39 | 52.24   |
|         |              |              | KNN      | 0.53           | 0.78  | 41.22   |
|         |              |              | DBN      | 0.62           | 0.87  | 50.67   |
|         |              |              | BPCA     | 0.63           | 0.87  | 48.09   |
| Fe      | 20           | MCMS         | Proposed | 0.81           | 0.92  | 30.14   |
|         |              |              | Linear   | 0.33           | 0.66  | 111.94  |
|         |              |              | KNN      | 0.74           | 0.83  | 57.10   |
|         |              |              | DBN      | 0.89           | 0.97  | 22.96   |
|         |              |              | BPCA     | 0.84           | 0.95  | 34.96   |
| Ca      | 20           | MCMS         | Proposed | 0.83           | 0.95  | 73.39   |
|         |              |              | Linear   | 0.70           | 0.90  | 55.72   |
|         |              |              | KNN      | 0.79           | 0.88  | 92.22   |
|         |              |              | DBN      | 0.87           | 0.95  | 61.60   |
|         |              |              | BPCA     | 0.84           | 0.94  | 81.37   |
| Si      | 20           | MCMS         | Proposed | 0.86           | 0.93  | 28.74   |
|         |              |              | Linear   | 0.76           | 0.93  | 25.78   |
|         |              |              | KNN      | 0.86           | 0.93  | 29.56   |
|         |              |              | DBN      | 0.76           | 0.93  | 28.74   |
|         |              |              | BPCA     | 0.79           | 0.92  | 38.40   |
| Ti      | 20           | MCMS         | Proposed | 0.52           | 0.82  | 40.11   |
|         |              |              | Linear   | 0.43           | 0.78  | 39.53   |
|         |              |              | KNN      | 0.48           | 0.73  | 47.21   |
|         |              |              | DBN      | 0.51           | 0.77  | 77.15   |
|         |              |              | BPCA     | 0.56           | 0.80  | 78.77   |
| Fe      | 10           | MCMI         | Proposed | 0.65           | 0.71  | 20.22   |
|         |              |              | Linear   | 0.04           | 0.46  | 56.84   |
|         |              |              | KNN      | 0.67           | 0.80  | 19.17   |
|         |              |              | DBN      | 0.72           | 0.90  | 14.43   |
|         |              |              | BPCA     | 0.73           | 0.82  | 17.06   |
| Ca      | 10           | MCMI         | Proposed | 0.87           | 0.91  | 18.66   |
|         |              |              | Linear   | 0.25           | 0.68  | 49.85   |
|         |              |              | KNN      | 0.85           | 0.89  | 21.26   |
|         |              |              | DBN      | 0.67           | 0.89  | 32.19   |
|         |              |              | BPCA     | 0.81           | 0.91  | 19.80   |
| Si      | 10           | MCMI         | Proposed | 0.91           | 0.97  | 12.65   |
|         |              |              | Linear   | 0.83           | 0.87  | 29.43   |
|         |              |              | KNN      | 0.74           | 0.91  | 21.37   |
|         |              |              | DBN      | 0.56           | 0.83  | 38.28   |
|         |              |              | BPCA     | 0.78           | 0.93  | 26.58   |
| Ti      | 10           | MCMI         | Proposed | 0.82           | 0.95  | 9.69    |
|         |              |              | Linear   | 0.11           | -0.34 | 56.65   |
|         |              |              | KNN      | 0.68           | 0.89  | 15.85   |
|         |              |              | DBN      | 0.39           | 0.46  | 23.20   |
|         |              |              | BPCA     | 0.42           | 0.69  | 31.26   |
| Fe      | 20           | MCMI         | Proposed | 0.79           | 0.81  | 20.98   |
|         |              |              | Linear   | 0.00           | 0.19  | 72.71   |
|         |              |              | KNN      | 0.66           | 0.72  | 32.84   |
|         |              |              | DBN      | 0.82           | 0.94  | 19.52   |
|         |              |              | BPCA     | 0.86           | 0.94  | 17.65   |
| Ca      | 20           | MCMI         | Proposed | 0.59           | 0.83  | 22.67   |
|         |              |              | Linear   | 0.05           | -0.16 | 39.87   |
|         |              |              | KNN      | 0.33           | 0.68  | 32.53   |
|         |              |              | DBN      | 0.69           | 0.88  | 35.79   |
|         |              |              | BPCA     | 0.58           | 0.87  | 28.40   |

Table S8 (continued)

| Species | % of Missing | MCMI or MCMS | Method   | R <sup>2</sup> | IoA  | MAPE(%) |
|---------|--------------|--------------|----------|----------------|------|---------|
| Si      |              |              | Proposed | 0.84           | 0.95 | 16.37   |
|         |              |              | Linear   | 0.28           | 0.31 | 101.43  |
|         |              |              | KNN      | 0.70           | 0.91 | 24.20   |
|         |              |              | DBN      | 0.63           | 0.87 | 29.35   |
|         |              |              | BPCA     | 0.44           | 0.77 | 40.08   |
| Ti      |              |              | Proposed | 0.69           | 0.84 | 22.97   |
|         |              |              | Linear   | 0.00           | 0.24 | 47.41   |
|         |              |              | KNN      | 0.56           | 0.81 | 31.61   |
|         |              |              | DBN      | 0.59           | 0.68 | 54.23   |
|         |              |              | BPCA     | 0.46           | 0.78 | 37.12   |

Table S9. Performance metrics of the imputation methods under Case 6.

| Species                      | % of Missing | MCMI or MCMS | Method   | R2   | IoA  | MAPE(%) |
|------------------------------|--------------|--------------|----------|------|------|---------|
| K                            | 10           | MCMS         | Proposed | 0.76 | 0.91 | 16.99   |
|                              |              |              | Linear   | 0.10 | 0.54 | 37.61   |
|                              |              |              | KNN      | 0.81 | 0.92 | 22.72   |
|                              |              |              | DBN      | 0.83 | 0.93 | 13.24   |
|                              |              |              | BPCA     | 0.79 | 0.93 | 18.87   |
| NH <sub>4</sub> <sup>+</sup> |              |              | Proposed | 0.85 | 0.94 | 42.55   |
|                              |              |              | Linear   | 0.40 | 0.35 | 158.94  |
|                              |              |              | KNN      | 0.84 | 0.82 | 62.48   |
|                              |              |              | DBN      | 0.83 | 0.90 | 60.45   |
|                              |              |              | BPCA     | 0.75 | 0.90 | 54.55   |
| NO <sub>3</sub> <sup>-</sup> |              |              | Proposed | 0.74 | 0.90 | 57.80   |
|                              |              |              | Linear   | 0.53 | 0.54 | 158.74  |
|                              |              |              | KNN      | 0.73 | 0.90 | 48.46   |
|                              |              |              | DBN      | 0.55 | 0.52 | 157.23  |
|                              |              |              | BPCA     | 0.59 | 0.84 | 70.03   |
| K                            | 20           | MCMS         | Proposed | 0.90 | 0.96 | 15.47   |
|                              |              |              | Linear   | 0.12 | 0.48 | 69.39   |
|                              |              |              | KNN      | 0.86 | 0.96 | 20.51   |
|                              |              |              | DBN      | 0.93 | 0.98 | 11.50   |
|                              |              |              | BPCA     | 0.90 | 0.96 | 13.89   |
| NH <sub>4</sub> <sup>+</sup> |              |              | Proposed | 0.78 | 0.93 | 39.41   |
|                              |              |              | Linear   | 0.03 | 0.10 | 234.85  |
|                              |              |              | KNN      | 0.67 | 0.84 | 66.19   |
|                              |              |              | DBN      | 0.74 | 0.86 | 39.67   |
|                              |              |              | BPCA     | 0.49 | 0.79 | 49.58   |
| NO <sub>3</sub> <sup>-</sup> |              |              | Proposed | 0.68 | 0.89 | 52.58   |
|                              |              |              | Linear   | 0.01 | 0.13 | 234.58  |
|                              |              |              | KNN      | 0.65 | 0.87 | 57.17   |
|                              |              |              | DBN      | 0.42 | 0.50 | 76.89   |
|                              |              |              | BPCA     | 0.52 | 0.82 | 52.73   |
| K                            | 10           | MCMI         | Proposed | 0.71 | 0.90 | 12.04   |
|                              |              |              | Linear   | 0.00 | 0.09 | 43.73   |
|                              |              |              | KNN      | 0.67 | 0.86 | 15.09   |
|                              |              |              | DBN      | 0.77 | 0.93 | 10.26   |
|                              |              |              | BPCA     | 0.74 | 0.92 | 12.27   |
| NH <sub>4</sub> <sup>+</sup> |              |              | Proposed | 0.94 | 0.98 | 12.81   |
|                              |              |              | Linear   | 0.41 | 0.76 | 62.08   |
|                              |              |              | KNN      | 0.84 | 0.92 | 22.87   |
|                              |              |              | DBN      | 0.84 | 0.95 | 19.83   |
|                              |              |              | BPCA     | 0.91 | 0.97 | 13.85   |
| NO <sub>3</sub> <sup>-</sup> |              |              | Proposed | 0.85 | 0.95 | 17.58   |
|                              |              |              | Linear   | 0.24 | 0.58 | 73.33   |
|                              |              |              | KNN      | 0.78 | 0.93 | 20.12   |
|                              |              |              | DBN      | 0.61 | 0.86 | 34.08   |
|                              |              |              | BPCA     | 0.74 | 0.92 | 31.49   |
| K                            | 20           | MCMI         | Proposed | 0.79 | 0.93 | 13.96   |
|                              |              |              | Linear   | 0.02 | 0.40 | 33.43   |
|                              |              |              | KNN      | 0.75 | 0.90 | 15.81   |
|                              |              |              | DBN      | 0.75 | 0.92 | 13.54   |
|                              |              |              | BPCA     | 0.80 | 0.94 | 12.77   |
| NH <sub>4</sub> <sup>+</sup> |              |              | Proposed | 0.90 | 0.95 | 21.24   |
|                              |              |              | Linear   | 0.00 | 0.21 | 52.32   |
|                              |              |              | KNN      | 0.63 | 0.86 | 38.68   |
|                              |              |              | DBN      | 0.86 | 0.96 | 21.19   |
|                              |              |              | BPCA     | 0.94 | 0.98 | 15.97   |
| NO <sub>3</sub> <sup>-</sup> |              |              | Proposed | 0.87 | 0.96 | 26.96   |
|                              |              |              | Linear   | 0.12 | 0.57 | 85.94   |
|                              |              |              | KNN      | 0.65 | 0.86 | 24.32   |
|                              |              |              | DBN      | 0.53 | 0.84 | 37.23   |
|                              |              |              | BPCA     | 0.72 | 0.91 | 34.03   |

Table S10. Performance metrics of the imputation methods under Case 7.

| Species | % of Missing | MCMI or MCMS | Method   | R <sup>2</sup> | IoA  | MAPE(%) |
|---------|--------------|--------------|----------|----------------|------|---------|
| K       | 10           | MCMS         | Proposed | 0.86           | 0.96 | 14.41   |
|         |              |              | Linear   | 0.03           | 0.10 | 67.61   |
|         |              |              | KNN      | 0.82           | 0.83 | 35.49   |

Table S10 (continued)

| Species | % of Missing | MCMI or MCMS | Method   | R <sup>2</sup> | IoA   | MAPE(%) |
|---------|--------------|--------------|----------|----------------|-------|---------|
| OC      |              |              | DBN      | 0.89           | 0.97  | 12.40   |
|         |              |              | BPCA     | 0.86           | 0.96  | 13.12   |
|         |              |              | Proposed | 0.81           | 0.95  | 12.40   |
|         |              |              | Linear   | 0.00           | 0.00  | 61.98   |
|         |              |              | KNN      | 0.70           | 0.85  | 24.09   |
| EC      |              |              | DBN      | 0.61           | 0.87  | 20.10   |
|         |              |              | BPCA     | 0.65           | 0.89  | 17.53   |
|         |              |              | Proposed | 0.80           | 0.94  | 15.37   |
|         |              |              | Linear   | 0.01           | -0.07 | 45.14   |
|         |              |              | KNN      | 0.66           | 0.87  | 17.83   |
| K       | 20           | MCMS         | DBN      | 0.66           | 0.89  | 16.55   |
|         |              |              | BPCA     | 0.71           | 0.91  | 18.08   |
|         |              |              | Proposed | 0.90           | 0.97  | 13.40   |
|         |              |              | Linear   | 0.13           | 0.61  | 51.78   |
|         |              |              | KNN      | 0.77           | 0.92  | 22.49   |
| OC      |              |              | DBN      | 0.89           | 0.97  | 13.37   |
|         |              |              | BPCA     | 0.92           | 0.98  | 12.82   |
|         |              |              | Proposed | 0.73           | 0.90  | 19.65   |
|         |              |              | Linear   | 0.18           | 0.47  | 41.49   |
|         |              |              | KNN      | 0.58           | 0.83  | 33.84   |
| EC      |              |              | DBN      | 0.63           | 0.88  | 25.93   |
|         |              |              | BPCA     | 0.63           | 0.86  | 20.21   |
|         |              |              | Proposed | 0.81           | 0.90  | 13.66   |
|         |              |              | Linear   | 0.12           | 0.35  | 46.47   |
|         |              |              | KNN      | 0.69           | 0.90  | 20.81   |
| K       | 10           | MCMI         | DBN      | 0.72           | 0.91  | 16.67   |
|         |              |              | BPCA     | 0.75           | 0.90  | 14.36   |
|         |              |              | Proposed | 0.92           | 0.97  | 16.10   |
|         |              |              | Linear   | 0.35           | 0.70  | 67.05   |
|         |              |              | KNN      | 0.93           | 0.98  | 15.41   |
| OC      |              |              | DBN      | 0.92           | 0.97  | 13.18   |
|         |              |              | BPCA     | 0.91           | 0.97  | 15.23   |
|         |              |              | Proposed | 0.79           | 0.91  | 22.36   |
|         |              |              | Linear   | 0.24           | 0.05  | 48.25   |
|         |              |              | KNN      | 0.74           | 0.88  | 19.66   |
| EC      |              |              | DBN      | 0.76           | 0.88  | 27.42   |
|         |              |              | BPCA     | 0.72           | 0.87  | 26.35   |
|         |              |              | Proposed | 0.90           | 0.91  | 15.43   |
|         |              |              | Linear   | 0.71           | 0.87  | 57.79   |
|         |              |              | KNN      | 0.91           | 0.96  | 11.44   |
| K       | 20           | MCMI         | DBN      | 0.86           | 0.87  | 17.56   |
|         |              |              | BPCA     | 0.88           | 0.92  | 17.42   |
|         |              |              | Proposed | 0.95           | 0.97  | 15.55   |
|         |              |              | Linear   | 0.57           | 0.84  | 49.68   |
|         |              |              | KNN      | 0.89           | 0.86  | 18.95   |
| OC      |              |              | DBN      | 0.95           | 0.98  | 12.98   |
|         |              |              | BPCA     | 0.95           | 0.98  | 17.73   |
|         |              |              | Proposed | 0.86           | 0.88  | 19.36   |
|         |              |              | Linear   | 0.00           | -0.26 | 40.51   |
|         |              |              | KNN      | 0.63           | 0.77  | 21.40   |
| EC      |              |              | DBN      | 0.77           | 0.84  | 24.18   |
|         |              |              | BPCA     | 0.71           | 0.85  | 20.16   |
|         |              |              | Proposed | 0.73           | 0.88  | 15.00   |
|         |              |              | Linear   | 0.00           | 0.20  | 42.39   |
|         |              |              | KNN      | 0.70           | 0.91  | 17.90   |
|         |              |              | DBN      | 0.69           | 0.91  | 20.31   |
|         |              |              | BPCA     | 0.62           | 0.86  | 17.27   |

Table S11. Performance metrics of the imputation methods under Case 8.

| Species                      | % of Missing | MCMI or MCMS | Method   | R <sup>2</sup> | IoA  | MAPE(%) |
|------------------------------|--------------|--------------|----------|----------------|------|---------|
| NH <sub>4</sub> <sup>+</sup> | 10           | MCMI         | Proposed | 0.87           | 0.96 | 20.04   |
|                              |              |              | Linear   | 0.00           | 0.15 | 133.22  |
|                              |              |              | KNN      | 0.66           | 0.87 | 43.66   |
|                              |              |              | DBN      | 0.72           | 0.82 | 47.55   |
| NO <sub>3</sub> <sup>-</sup> |              |              | BPCA     | 0.80           | 0.75 | 70.29   |
|                              |              |              | Proposed | 0.84           | 0.95 | 19.78   |

Table S11 (continued)

| Species                      | % of Missing | MCMI or MCMS | Method   | R <sup>2</sup> | IoA   | MAPE(%) |
|------------------------------|--------------|--------------|----------|----------------|-------|---------|
| OC                           |              |              | Linear   | 0.10           | 0.62  | 75.76   |
|                              |              |              | KNN      | 0.74           | 0.92  | 23.25   |
|                              |              |              | DBN      | 0.58           | 0.90  | 30.93   |
|                              |              |              | BPCA     | 0.68           | 0.90  | 30.93   |
|                              |              |              | Proposed | 0.88           | 0.91  | 19.81   |
| EC                           |              |              | Linear   | 0.23           | 0.60  | 76.21   |
|                              |              |              | KNN      | 0.80           | 0.91  | 20.87   |
|                              |              |              | DBN      | 0.79           | 0.90  | 24.06   |
|                              |              |              | BPCA     | 0.78           | 0.84  | 23.86   |
|                              |              |              | Proposed | 0.88           | 0.96  | 12.01   |
| NH <sub>4</sub> <sup>+</sup> | 20           | MCMI         | Linear   | 0.44           | 0.75  | 33.96   |
|                              |              |              | KNN      | 0.84           | 0.95  | 12.75   |
|                              |              |              | DBN      | 0.85           | 0.93  | 15.65   |
|                              |              |              | BPCA     | 0.87           | 0.94  | 23.02   |
|                              |              |              | Proposed | 0.90           | 0.97  | 23.66   |
| NO <sub>3</sub> <sup>-</sup> |              |              | Linear   | 0.08           | 0.44  | 140.73  |
|                              |              |              | KNN      | 0.67           | 0.84  | 44.03   |
|                              |              |              | DBN      | 0.84           | 0.94  | 46.61   |
|                              |              |              | BPCA     | 0.87           | 0.95  | 49.73   |
|                              |              |              | Proposed | 0.83           | 0.94  | 25.66   |
| OC                           |              |              | Linear   | 0.42           | 0.78  | 58.26   |
|                              |              |              | KNN      | 0.84           | 0.93  | 24.45   |
|                              |              |              | DBN      | 0.64           | 0.82  | 48.05   |
|                              |              |              | BPCA     | 0.77           | 0.92  | 39.99   |
|                              |              |              | Proposed | 0.86           | 0.89  | 19.89   |
| EC                           |              |              | Linear   | 0.49           | 0.34  | 41.37   |
|                              |              |              | KNN      | 0.78           | 0.89  | 20.38   |
|                              |              |              | DBN      | 0.79           | 0.89  | 24.39   |
|                              |              |              | BPCA     | 0.77           | 0.86  | 21.74   |
|                              |              |              | Proposed | 0.87           | 0.96  | 13.46   |
| NH <sub>4</sub> <sup>+</sup> | 10           | MCMS         | Linear   | 0.51           | 0.77  | 38.88   |
|                              |              |              | KNN      | 0.84           | 0.95  | 11.57   |
|                              |              |              | DBN      | 0.79           | 0.94  | 14.54   |
|                              |              |              | BPCA     | 0.83           | 0.95  | 18.28   |
|                              |              |              | Proposed | 0.81           | 0.92  | 30.32   |
| NO <sub>3</sub> <sup>-</sup> |              |              | Linear   | 0.00           | 0.36  | 159.90  |
|                              |              |              | KNN      | 0.76           | 0.92  | 51.24   |
|                              |              |              | DBN      | 0.87           | 0.91  | 25.72   |
|                              |              |              | BPCA     | 0.86           | 0.85  | 29.97   |
|                              |              |              | Proposed | 0.75           | 0.88  | 44.35   |
| OC                           |              |              | Linear   | 0.01           | 0.41  | 169.02  |
|                              |              |              | KNN      | 0.71           | 0.88  | 48.13   |
|                              |              |              | DBN      | 0.71           | 0.60  | 100.14  |
|                              |              |              | BPCA     | 0.79           | 0.78  | 51.22   |
|                              |              |              | Proposed | 0.86           | 0.96  | 12.69   |
| EC                           |              |              | Linear   | 0.05           | -0.01 | 104.49  |
|                              |              |              | KNN      | 0.69           | 0.90  | 20.87   |
|                              |              |              | DBN      | 0.61           | 0.87  | 22.32   |
|                              |              |              | BPCA     | 0.60           | 0.86  | 21.36   |
|                              |              |              | Proposed | 0.89           | 0.97  | 12.07   |
| NH <sub>4</sub> <sup>+</sup> | 20           | MCMS         | Linear   | 0.34           | 0.70  | 32.59   |
|                              |              |              | KNN      | 0.79           | 0.93  | 14.71   |
|                              |              |              | DBN      | 0.78           | 0.93  | 12.49   |
|                              |              |              | BPCA     | 0.66           | 0.90  | 17.80   |
|                              |              |              | Proposed | 0.82           | 0.94  | 32.44   |
| NO <sub>3</sub> <sup>-</sup> |              |              | Linear   | 0.29           | 0.67  | 52.16   |
|                              |              |              | KNN      | 0.75           | 0.90  | 40.32   |
|                              |              |              | DBN      | 0.88           | 0.97  | 23.75   |
|                              |              |              | BPCA     | 0.55           | 0.81  | 34.39   |
|                              |              |              | Proposed | 0.66           | 0.88  | 47.50   |
| OC                           |              |              | Linear   | 0.37           | 0.74  | 50.80   |
|                              |              |              | KNN      | 0.53           | 0.84  | 38.43   |
|                              |              |              | DBN      | 0.68           | 0.77  | 43.09   |
|                              |              |              | BPCA     | 0.54           | 0.83  | 38.60   |
|                              |              |              | Proposed | 0.63           | 0.88  | 20.19   |
| OC                           |              |              | Linear   | 0.17           | 0.59  | 31.67   |
|                              |              |              | KNN      | 0.58           | 0.82  | 27.06   |
|                              |              |              | DBN      | 0.57           | 0.85  | 21.11   |
|                              |              |              | BPCA     | 0.55           | 0.85  | 21.74   |

Table S11 (continued)

| Species | % of Missing | MCMI or MCMS | Method   | R <sup>2</sup> | IoA  | MAPE(%) |
|---------|--------------|--------------|----------|----------------|------|---------|
| EC      |              |              | Proposed | 0.82           | 0.94 | 14.53   |
|         |              |              | Linear   | 0.17           | 0.61 | 31.56   |
|         |              |              | KNN      | 0.76           | 0.91 | 15.14   |
|         |              |              | DBN      | 0.83           | 0.94 | 14.00   |
|         |              |              | BPCA     | 0.76           | 0.92 | 17.16   |

Table S12. Performance of imputation methods under Case 9.

| Species                      | % of Missing | MCMI or MCMS | Method   | R <sup>2</sup> | IoA   | MAPE(%) |
|------------------------------|--------------|--------------|----------|----------------|-------|---------|
| K                            | 10           | MCMI         | Proposed | 0.96           | 0.96  | 17.61   |
|                              |              |              | Linear   | 0.02           | -1.13 | 142.37  |
|                              |              |              | KNN      | 0.89           | 0.91  | 24.24   |
|                              |              |              | DBN      | 0.96           | 0.98  | 11.29   |
|                              |              |              | BPCA     | 0.96           | 0.98  | 11.45   |
| NH <sub>4</sub> <sup>+</sup> |              |              | Proposed | 0.86           | 0.96  | 20.30   |
|                              |              |              | Linear   | 0.00           | 0.15  | 133.22  |
|                              |              |              | KNN      | 0.64           | 0.86  | 43.61   |
|                              |              |              | DBN      | 0.76           | 0.84  | 42.19   |
|                              |              |              | BPCA     | 0.79           | 0.74  | 72.12   |
| NO <sub>3</sub> <sup>-</sup> |              |              | Proposed | 0.84           | 0.96  | 19.87   |
|                              |              |              | Linear   | 0.10           | 0.62  | 75.76   |
|                              |              |              | KNN      | 0.76           | 0.93  | 23.13   |
|                              |              |              | DBN      | 0.07           | 0.15  | 84.06   |
|                              |              |              | BPCA     | 0.68           | 0.89  | 31.22   |
| OC                           |              |              | Proposed | 0.89           | 0.89  | 20.63   |
|                              |              |              | Linear   | 0.23           | 0.60  | 76.21   |
|                              |              |              | KNN      | 0.81           | 0.91  | 20.67   |
|                              |              |              | DBN      | 0.79           | 0.91  | 24.73   |
|                              |              |              | BPCA     | 0.78           | 0.84  | 23.96   |
| EC                           |              |              | Proposed | 0.88           | 0.96  | 11.78   |
|                              |              |              | Linear   | 0.44           | 0.75  | 33.96   |
|                              |              |              | KNN      | 0.82           | 0.94  | 13.22   |
|                              |              |              | DBN      | 0.78           | 0.89  | 19.52   |
|                              |              |              | BPCA     | 0.87           | 0.94  | 22.90   |
| K                            | 20           | MCMI         | Proposed | 0.81           | 0.93  | 14.56   |
|                              |              |              | Linear   | 0.37           | 0.73  | 27.62   |
|                              |              |              | KNN      | 0.75           | 0.91  | 18.56   |
|                              |              |              | DBN      | 0.81           | 0.93  | 15.41   |
|                              |              |              | BPCA     | 0.84           | 0.95  | 13.87   |
| NH <sub>4</sub> <sup>+</sup> |              |              | Proposed | 0.89           | 0.97  | 23.51   |
|                              |              |              | Linear   | 0.08           | 0.44  | 140.73  |
|                              |              |              | KNN      | 0.67           | 0.84  | 44.16   |
|                              |              |              | DBN      | 0.86           | 0.95  | 40.71   |
|                              |              |              | BPCA     | 0.87           | 0.95  | 51.33   |
| NO <sub>3</sub> <sup>-</sup> |              |              | Proposed | 0.83           | 0.94  | 25.89   |
|                              |              |              | Linear   | 0.42           | 0.78  | 58.26   |
|                              |              |              | KNN      | 0.84           | 0.93  | 24.83   |
|                              |              |              | DBN      | 0.66           | 0.87  | 52.42   |
|                              |              |              | BPCA     | 0.77           | 0.93  | 39.75   |
| OC                           |              |              | Proposed | 0.86           | 0.90  | 19.69   |
|                              |              |              | Linear   | 0.49           | 0.34  | 41.37   |
|                              |              |              | KNN      | 0.78           | 0.89  | 20.15   |
|                              |              |              | DBN      | 0.79           | 0.90  | 22.81   |
|                              |              |              | BPCA     | 0.76           | 0.85  | 21.54   |
| EC                           |              |              | Proposed | 0.86           | 0.95  | 14.09   |
|                              |              |              | Linear   | 0.51           | 0.77  | 38.88   |
|                              |              |              | KNN      | 0.81           | 0.93  | 13.02   |
|                              |              |              | DBN      | 0.68           | 0.89  | 18.64   |
|                              |              |              | BPCA     | 0.81           | 0.84  | 18.85   |

Table S13. Pollution sources and corresponding non-missable key tracers

| Pollution Sources    | Non-Missable Key Tracers             |
|----------------------|--------------------------------------|
| Secondary Nitrate    | $\text{NH}_4^+$ , $\text{NO}_3^-$    |
| Secondary Sulfate    | $\text{NH}_4^+$ , $\text{SO}_4^{2-}$ |
| On-road Traffic      | OC, EC, Ba, Cu                       |
| Coal Combustion      | OC, EC, As, Se, K, Pb                |
| Metal Smelting       | Mn, Pb, Cr, Ni, Zn                   |
| Heavy Oil Combustion | V, Ni                                |
| Crustal Dust         | K, Fe, Ca, Si, Ti                    |

Table S14. Sensitivity analysis of different pre-imputation methods under the MCMS missing pattern (Case 4, 10% missing rate)

| Species         | Pre-Imputation Method | $R^2$ | IoA  | MAPE(%) |
|-----------------|-----------------------|-------|------|---------|
| $\text{NH}_4^+$ | KNN                   | 0.92  | 0.95 | 20.67   |
|                 | LI                    | 0.82  | 0.88 | 40.32   |
|                 | DBN                   | 0.95  | 0.92 | 23.61   |
|                 | BPCA                  | 0.96  | 0.81 | 24.58   |
| $\text{NO}_3^-$ | KNN                   | 0.85  | 0.95 | 23.92   |
|                 | LI                    | 0.76  | 0.90 | 42.04   |
|                 | DBN                   | 0.89  | 0.91 | 33.11   |
|                 | BPCA                  | 0.90  | 0.75 | 22.91   |

## References

- Moritz, S., Sardá, A., Bartz-Beielstein, T., Zaefferer, M., and Stork, J.: Comparison of different methods for univariate time series imputation in R, arXiv preprint arXiv:1510.03924, doi:10.48550/arXiv.1510.03924, 2015.
- Bennett, N. D., Croke, B. F. W., Guariso, G., Guillaume, J. H. A., Hamilton, S. H., Jakeman, A. J., Marsili-Libelli, S., Newham, L. T. H., Norton, J. P., Perrin, C., Pierce, S. A., Robson, B., Seppelt, R., Voinov, A. A., Fath, B. D., and Andreassian, V.: Characterising performance of environmental models, *Environmental Modelling & Software*, 40, 1–20, doi:10.1016/j.envsoft.2012.09.011, 2013.
- Ibrahim, I. A. and Khatib, T.: A novel hybrid model for hourly global solar radiation prediction using random forests technique and firefly algorithm, *Energy Conversion and Management*, 138, 413–425, doi:10.1016/j.enconman.2017.02.006, 2017.
- Liu, B., Wu, J., Zhang, J., Wang, L., Yang, J., Liang, D., Dai, Q., Bi, X., Feng, Y., Zhang, Y., and Zhang, Q.: Characterization and source apportionment of PM<sub>2.5</sub> based on error estimation from EPA PMF 5.0 model at a medium city in China, *Environmental Pollution*, 222, 10–22, doi:10.1016/j.envpol.2017.01.005, 2017.
- Kim, E., Hopke, P. K., and Qin, Y.: Estimation of organic carbon blank values and error structures of the speciation trends network data for source apportionment, *Journal of the Air & Waste Management Association*, 55, 1190–1199, doi:10.1080/10473289.2005.10464705, 2005.
- Kim, E. and Hopke, P. K.: Comparison between sample-species specific uncertainties and estimated uncertainties for the source apportionment of the speciation trends network data, *Atmospheric Environment*, 41, 567–575, doi:10.1016/j.atmosenv.2006.08.023, 2007.
- Tian, S., Pan, Y., and Wang, Y.: Size-resolved source apportionment of particulate matter in urban Beijing during haze and non-haze episodes, *Atmospheric Chemistry and Physics*, 16, 1–19, doi:10.5194/acp-16-1-2016, 2016.
- Polissar, A. V., Hopke, P. K., Paatero, P., Malm, W. C., and Sisler, J. F.: Atmospheric aerosol over Alaska: 2. Elemental composition and sources, *Journal of Geophysical Research: Atmospheres*, 103, 19045–19057, doi:10.1029/98JD01212, 1998.
- Xie, M., Lu, X., Ding, F., Cui, W., Zhang, Y., and Feng, W.: Evaluating the influence of constant source profile presumption on PMF analysis of PM<sub>2.5</sub> by comparing long- and short-term hourly observation-based modeling, *Environmental Pollution*, 314, 120273, doi:10.1016/j.envpol.2022.120273, 2022.
